# Supplementary material for: Strong second order nonlinear optical properties of azulene-based porphyrin derivatives
Source: Royal Society of Chemistry journal article supplement (doi:10.1039/d2cp00735e), 2022-01-01
Supplement: d2cp00735e1.pdf [file d2cp00735e1.pdf]

## Supporting Information

### Strong second order nonlinear optical properties of azulene-based porphyrin derivatives

Cui-Cui Yang,<sup>#a</sup> Li Li,<sup>#a</sup> Wei Quan Tian,<sup>\*a</sup> Wei-Qi Li,<sup>\*b,c</sup> Ling Yang,<sup>\*d</sup>

<sup>a</sup> Chongqing Key Laboratory of Theoretical and Computational Chemistry, College of Chemistry and Chemical Engineering, Chongqing University, Huxi Campus, Chongqing 401331, P. R. China

<sup>b</sup> Department of Physics, Harbin Institute of Technology, Harbin 150001, P. R. China

<sup>c</sup> Collaborative Innovation Center of Extreme Optics, Shanxi University, Taiyuan 030006, P. R. China

<sup>d</sup> MIT Key Laboratory of Critical Materials Technology for New Energy Conversion and Storage, Institute of Theoretical and Simulational Chemistry, School of Chemistry and Chemical Engineering, Harbin Institute of Technology, Harbin 150001, P. R. China

<sup>#</sup>C. C. Yang and L. Li contributed equally to this work.

\*Corresponding author: tianwq@cqu.edu.cn

#### Supporting Information list:

**Figure S1** Evolution of the static first hyperpolarizability ( $\langle\beta_0\rangle$ ) with the numbers of excited states in Zn-APs-b.

**Figure S2** Electronic spectra of  $6b^{S1}$  predicted with TD-CAM-B3LYP/6-31++G(d,p) in gas phase and chloroform, respectively. The red numerbs are the measured wavelengths.

**Figure S3** (a) Frontier molecular orbitals of three APs-ab molecules. (b) The transition nature of major electron excitations in porphyrin (P), azulene (A), APs-pen and APs-a.

**Figure S4** (a) Structures, electronic properties, and (b) frontier molecular orbitals, molecular orbital energy diagrams of APs-a and  $[APs-a]^{2-}$ .

**Figure S5** Evolution of the static first hyperpolarizability ( $\langle\beta_0\rangle$ ) with electron excitations in P-NO<sub>2</sub>.

**Figure S6** The predicted  $\langle\beta_0\rangle$  of APs-a, APs-b and APs-c from TD-CAM-B3LYP/6-31++G(d,p)-SOS and coupled perturbed Kohn–Sham (CPKS) model at CAM-B3LYP/6-31++G(d,p) level, respectively.

**Figure S7** Second harmonic generation (SHG) and electro-optical Pockels effect (EOPE) of APs-a, APs-b and APs-c at 1064 nm predicted by TD-CAM-B3LYP/6-31++G(d,p)-SOS.

**Figure S8** Evolution of the  $\langle\beta_0\rangle$  with the electron excitations in Mg-APs-ab and Zn-APs-ab.

**Figure S9** Variation of the  $\langle\beta_0\rangle$  with different solvents.

**Figure S10** Evolution of the  $\langle\beta_0\rangle$  with the electron excitations in classical donor-acceptor porphyrin-based molecules [e.g., compounds 10 and 11<sup>S2</sup>, and 1(Zn<sup>II</sup>)<sup>S3</sup>] and the recently reported similar molecule D23<sup>S4</sup>.

**Figure S11** Two-dimensional second order NLO spectra of (a) APs-c and (b) Zn-APs-b scanned with step size of 0.005 eV.

**Table S1** Major electron excitations with transition nature in porphyrin (P), azulene (A) and azulene-defected porphyrins (APs).

**Table S2** Predicted major  $\beta_{ijk}$  [ $i, j, k \in (x, y, z)$ ] ( $\times 10^{-30}$  esu) of APs-hep/pen and APs-a/b/c, and the related molecular properties with important contributions to the  $\beta_{ijk}$  according to the SOS model.

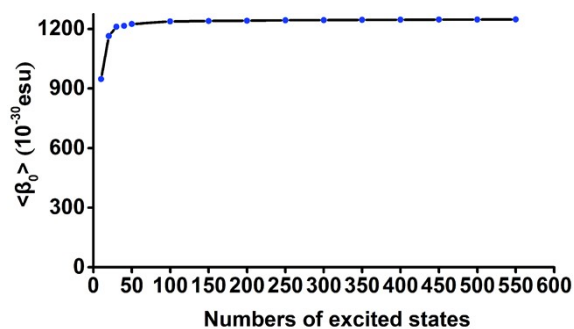

**Figure S1** Evolution of the static first hyperpolarizability ( $\langle \beta_0 \rangle$ ) with the numbers of excited states in Zn-APs-b.

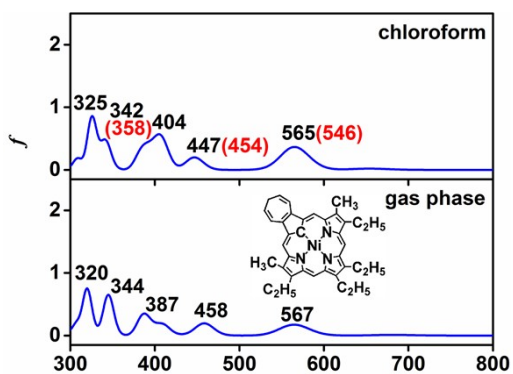

**Figure S2** Electronic spectra of  $6b^{S1}$  predicted with TD-CAM-B3LYP/6-31++G(d,p) in gas phase and chloroform, respectively. The red numerbs are the measured wavelengths.

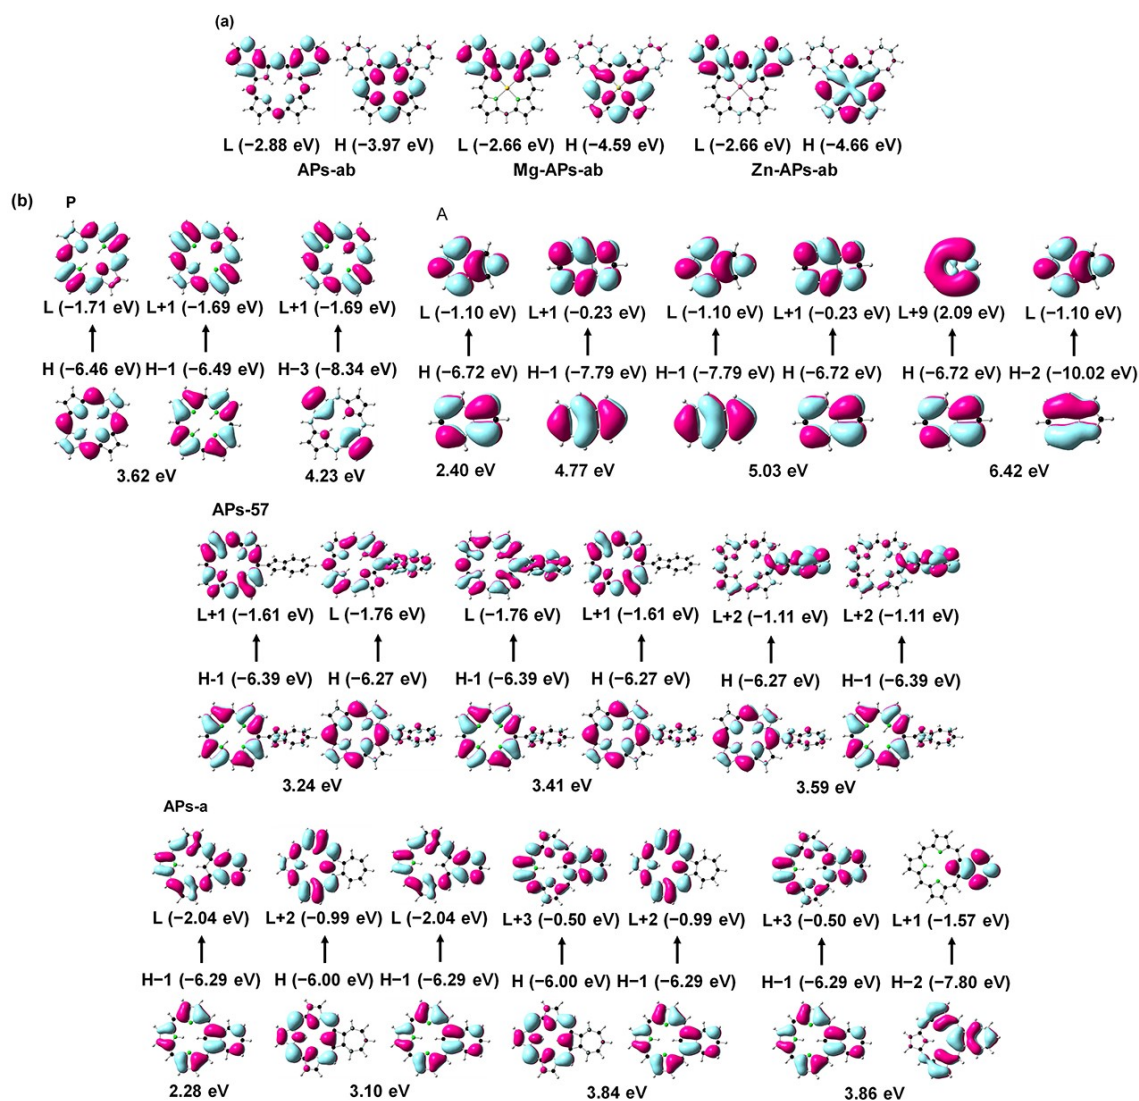

**Figure S3** (a) Frontier molecular orbitals of three APs-ab molecules. (b) The transition nature of major electron excitations in porphyrin (P), azulene (A), APs-pen and APs-a.

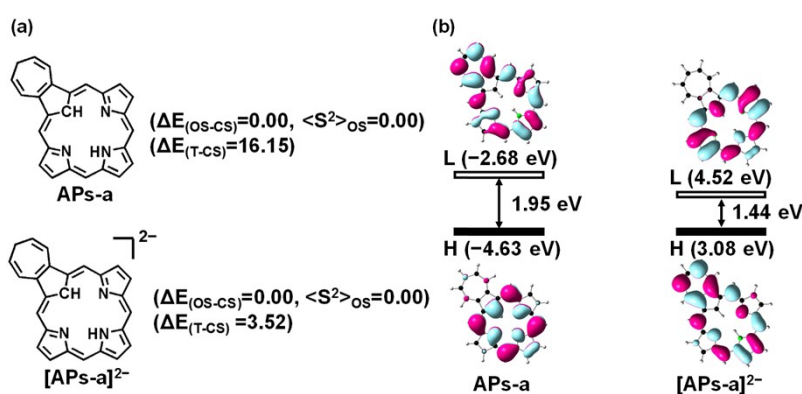

**Figure S4** (a) Structures, electronic properties, and (b) frontier molecular orbitals, molecular orbital energy diagrams of APs-a and [APs-a]<sup>2-</sup>.  $\Delta E_{OS-CS}$  and  $\Delta E_{T-CS}$  (in Kcal/mol) are the relative electronic energy differences between the open-shell singlet or triplet (T) and the closed-shell singlet (CS) (CS is taken as the reference).

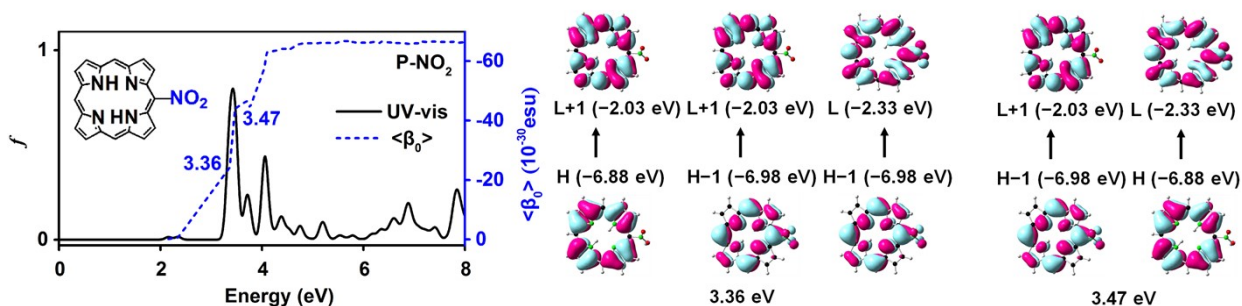

**Figure S5** Evolution of the static first hyperpolarizability ( $\langle\beta_0\rangle$ ) with electron excitations in P-NO<sub>2</sub>.  $f$  is the oscillator strength in arbitrary units. The electric spectra are plotted with the Lorentzian fitting function (half-height-width of 400 cm<sup>-1</sup>). The molecular orbitals are predicted with the CAM-B3LYP/6-31++G(d,p).

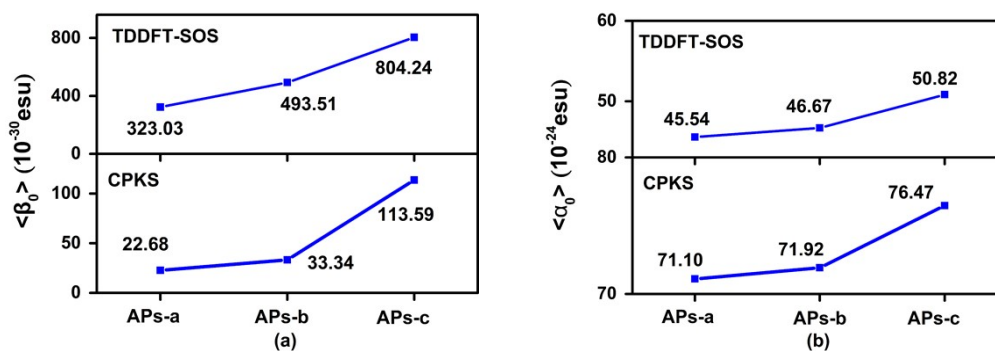

**Figure S6** The predicted (a)  $\langle\beta_0\rangle$  and (b)  $\langle\alpha_0\rangle$  of APs-a, APs-b and APs-c from TD-CAM-B3LYP/6-31++G(d,p)-SOS and coupled perturbed Kohn–Sham (CPKS) model at CAM-B3LYP/6-31++G(d,p) level, respectively.

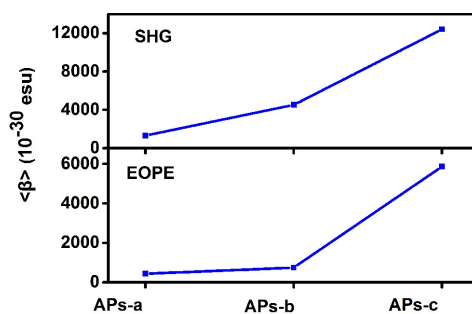

**Figure S7** Second harmonic generation (SHG) and electro-optical Pockels effect (EOPE) of APs-a, APs-b and APs-c at 1064 nm predicted by TD-CAM-B3LYP/6-31++G(d,p)-SOS.

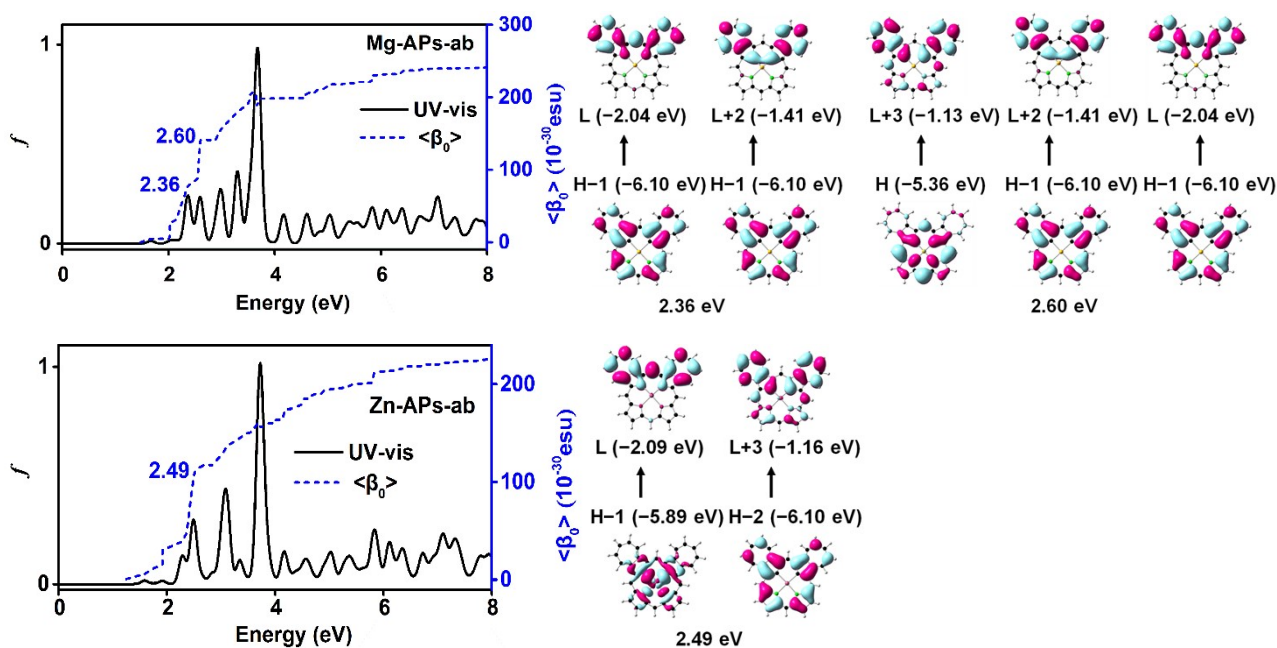

**Figure S8** Evolution of the  $\langle\beta_0\rangle$  with the electron excitations in Mg-APs-ab and Zn-APs-ab.

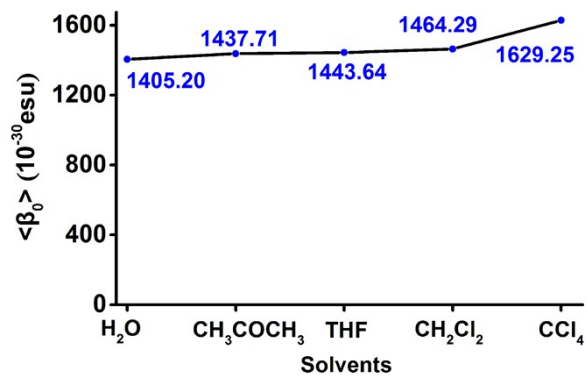

**Figure S9** Variation of the  $\langle\beta_0\rangle$  with different solvents. *e.g.*, water (H<sub>2</sub>O), acetone (CH<sub>3</sub>COCH<sub>3</sub>), TetraHydroFuran (THF), Dichloromethane MethyleneChloride (CH<sub>2</sub>Cl<sub>2</sub>) and CarbonTetraChloride (CCl<sub>4</sub>).

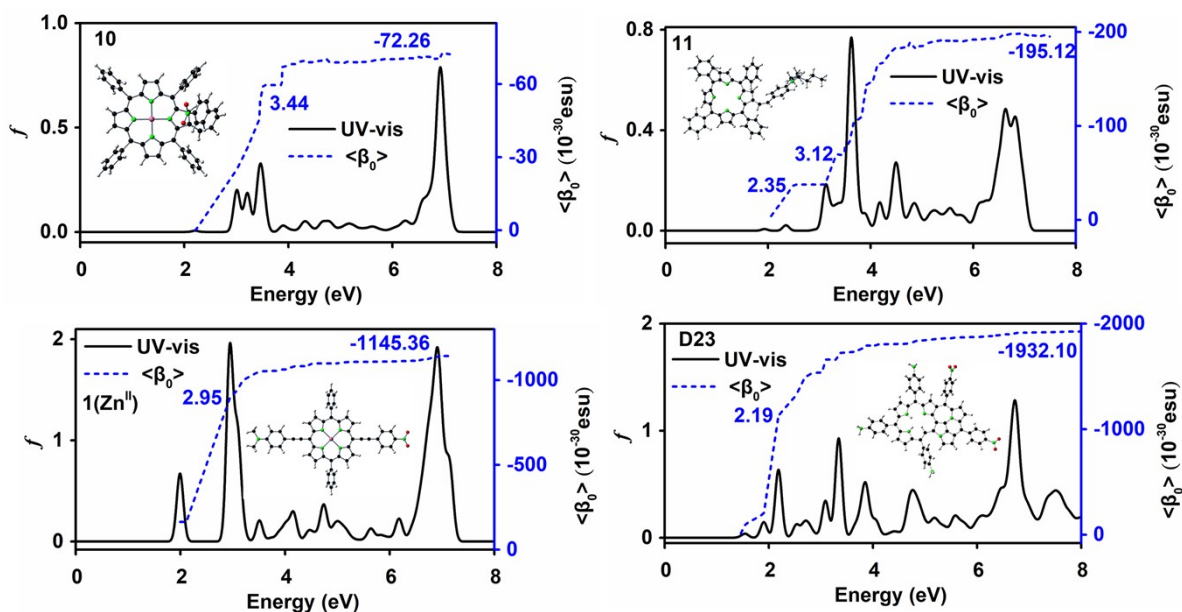

**Figure S10** Evolution of the  $\langle \beta_0 \rangle$  with the electron excitations in classical donor-acceptor porphyrin-based molecules [e.g., compounds 10 and 11<sup>S2</sup>, and 1(Zn<sup>II</sup>)<sup>S3</sup>] and the recently reported similar molecule D23<sup>S4</sup>.

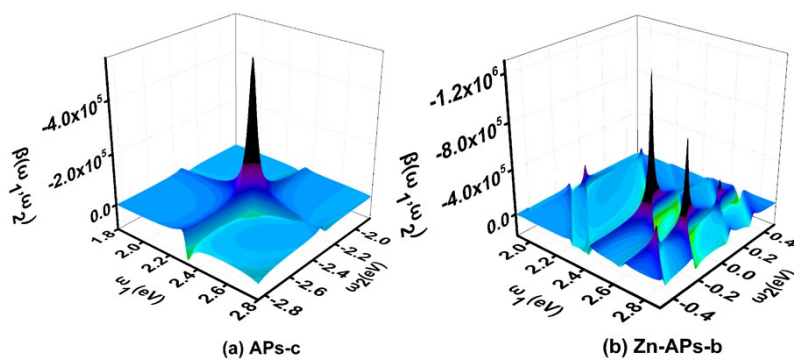

**Figure S11** Two-dimensional second order NLO spectra of (a) APs-c and (b) Zn-APs-b scanned with step size of 0.005 eV [(a)  $\omega_1$  scanned from 1.80 eV to 2.80 eV and  $\omega_2$  scanned from -0.50 eV to 0.50 eV; (b)  $\omega_1$  scanned from 1.90 eV to 2.90 eV and  $\omega_2$  scanned from -0.50 eV to 0.50 eV].

**Table S1** Major electron excitations with transition nature in porphyrin (P), azulene (A) and azulene-defected porphyrins (APs).  $f$  is the oscillator strength,  $\lambda$  is the wavelength, TNMC to  $\langle\beta_0\rangle$  is the transition nature of electron excitation with major contribution to  $\langle\beta_0\rangle$ .

| Compounds  | $f$    | $\lambda/\text{nm}$ (eV) | Transition               | TNMC to $\langle\beta_0\rangle$                                  | Contributions to $\langle\beta_0\rangle$<br>( $10^{-30}$ esu) |
|------------|--------|--------------------------|--------------------------|------------------------------------------------------------------|---------------------------------------------------------------|
| P          | 0.0015 | 568.93 (2.18)            | $S_0 \rightarrow S_1$    | H $\rightarrow$ L+1 (52.78%)<br>H-1 $\rightarrow$ L (47.30%)     | 0.00                                                          |
|            | 0.9024 | 352.29 (3.52)            | $S_0 \rightarrow S_3$    | H-1 $\rightarrow$ L (47.98%)<br>H $\rightarrow$ L+1 (47.30%)     | 0.00                                                          |
|            | 1.2030 | 342.35 (3.62)            | $S_0 \rightarrow S_4$    | H $\rightarrow$ L (51.08%)<br>H-1 $\rightarrow$ L+1 (50.24%)     | 0.00                                                          |
|            | 0.5181 | 293.14 (4.23)            | $S_0 \rightarrow S_6$    | H-3 $\rightarrow$ L+1 (78.58%)                                   | 0.00                                                          |
|            | 0.0749 | 278.03 (4.46)            | $S_0 \rightarrow S_8$    | H-3 $\rightarrow$ L (90.42%)                                     | 0.00                                                          |
| A          | 0.0081 | 516.86 (2.40)            | $S_0 \rightarrow S_1$    | H $\rightarrow$ L (97.14%)                                       | 1.94                                                          |
|            | 0.0809 | 260.12 (4.77)            | $S_0 \rightarrow S_3$    | H-1 $\rightarrow$ L+1 (85.8%)                                    | 2.97                                                          |
|            | 1.1499 | 246.68 (5.03)            | $S_0 \rightarrow S_5$    | H-1 $\rightarrow$ L (52.96%)<br>H $\rightarrow$ L+1 (45.62%)     | 2.64                                                          |
|            | 0.3188 | 193.09 (6.42)            | $S_0 \rightarrow S_{15}$ | H $\rightarrow$ L+9 (55.22%)<br>H-2 $\rightarrow$ L (32.88%)     | 52.86                                                         |
| APs-hep    | 0.0017 | 578.09 (2.14)            | $S_0 \rightarrow S_1$    | H $\rightarrow$ L+1 (39.26%)<br>H-1 $\rightarrow$ L (33.92%)     | 0.00                                                          |
|            | 1.3332 | 366.13 (3.39)            | $S_0 \rightarrow S_4$    | H-1 $\rightarrow$ L+1 (28.72%)<br>H $\rightarrow$ L (27.56%)     | -58.83                                                        |
|            | 0.8864 | 358.66 (3.46)            | $S_0 \rightarrow S_5$    | H-1 $\rightarrow$ L (37.02%)<br>H $\rightarrow$ L+1 (26.38%)     | 19.23                                                         |
|            | 0.2565 | 348.41 (3.56)            | $S_0 \rightarrow S_6$    | H $\rightarrow$ L+2 (21.70%)<br>H-2 $\rightarrow$ L+1 (18.40%)   | 26.66                                                         |
|            | 0.1851 | 342.41 (3.62)            | $S_0 \rightarrow S_7$    | H-2 $\rightarrow$ L (73.44%)                                     | 19.46                                                         |
|            | 0.5917 | 298.79 (4.15)            | $S_0 \rightarrow S_{12}$ | H-5 $\rightarrow$ L+1 (37.54%)<br>H-5 $\rightarrow$ L (32.10%)   | 8.05                                                          |
|            | 0.5564 | 247.61 (5.01)            | $S_0 \rightarrow S_{28}$ | H-3 $\rightarrow$ L+2 (36.68%)<br>H-2 $\rightarrow$ L+3 (35.28%) | 3.14                                                          |
| APs-pen    | 0.0098 | 584.80 (2.12)            | $S_0 \rightarrow S_1$    | H $\rightarrow$ L+1 (35.44%)<br>H-1 $\rightarrow$ L (29.90%)     | 0.12                                                          |
|            | 1.2875 | 383.08 (3.24)            | $S_0 \rightarrow S_4$    | H-1 $\rightarrow$ L+1 (32.52%)<br>H $\rightarrow$ L (32.14%)     | 245.13                                                        |
|            | 0.7452 | 363.80 (3.41)            | $S_0 \rightarrow S_5$    | H-1 $\rightarrow$ L (50.22%)<br>H $\rightarrow$ L+1 (41.26%)     | 12.31                                                         |
|            | 0.7105 | 344.99 (3.59)            | $S_0 \rightarrow S_6$    | H $\rightarrow$ L+2 (35.18%)<br>H-1 $\rightarrow$ L+1 (24.66%)   | 30.44                                                         |
|            | 0.5394 | 302.62 (4.10)            | $S_0 \rightarrow S_{12}$ | H-5 $\rightarrow$ L (28.24%)<br>H-5 $\rightarrow$ L+1 (23.40%)   | -4.88                                                         |
|            | 0.5099 | 244.09 (5.08)            | $S_0 \rightarrow S_{30}$ | H-3 $\rightarrow$ L+2 (34.14%)<br>H-2 $\rightarrow$ L+3 (22.08%) | 18.04                                                         |
| Mg-APs-hep | 0.0034 | 547.15 (2.27)            | $S_0 \rightarrow S_1$    | H $\rightarrow$ L (48.86%)<br>H-1 $\rightarrow$ L+1 (44.70%)     | 0.01                                                          |
|            | 1.6636 | 363.22 (3.41)            | $S_0 \rightarrow S_4$    | H-1 $\rightarrow$ L (43.70%)<br>H $\rightarrow$ L+1 (38.24%)     | -164.15                                                       |
| Zn-APs-hep | 0.0070 | 534.36 (2.32)            | $S_0 \rightarrow S_1$    | H $\rightarrow$ L (46.70%)<br>H-1 $\rightarrow$ L+1 (34.42%)     | 0.13                                                          |
|            | 1.6842 | 358.57 (3.46)            | $S_0 \rightarrow S_4$    | H-1 $\rightarrow$ L (47.60%)                                     | -125.11                                                       |

|            |        |                |                          |                                                      |        |
|------------|--------|----------------|--------------------------|------------------------------------------------------|--------|
|            |        |                |                          | H→L+1 (38.38%)                                       |        |
| Mg-APs-pen | 0.0492 | 563.96 (2.20)  | $S_0 \rightarrow S_1$    | H→L (55.22%)<br>H-1→L+1 (39.38%)                     | 1.79   |
|            | 1.3199 | 391.72 (3.17)  | $S_0 \rightarrow S_4$    | H→L (34.6%)<br>H-1→L+1 (32.44%)                      | 256.25 |
| Zn-APs-pen | 0.0063 | 539.15 (2.30)  | $S_0 \rightarrow S_1$    | H-1→L (47.32%)<br>H→L+1 (39.74%)                     | 0.06   |
|            | 1.3006 | 377.57 (3.28)  | $S_0 \rightarrow S_4$    | H→L (41.30%)<br>H-1→L+1 (29.50%)                     | 231.62 |
| APs-a      | 0.0254 | 683.05 (1.82)  | $S_0 \rightarrow S_1$    | H→L (90.78%)                                         | 7.54   |
|            | 0.1614 | 543.39 (2.28)  | $S_0 \rightarrow S_3$    | H-1→L (64.06%)                                       | 36.01  |
|            | 1.1468 | 400.15 (3.10)  | $S_0 \rightarrow S_5$    | H→L+2 (53.94%)<br>H-1→L (28.04%)                     | 189.44 |
|            | 0.6523 | 322.79 (3.84)  | $S_0 \rightarrow S_9$    | H→L+3 (57.14%)<br>H-1→L+2 (26.94%)                   | -1.25  |
|            | 0.5585 | 321.26 (3.86)  | $S_0 \rightarrow S_{10}$ | H-1→L+3 (38.16%)<br>H-2→L+1 (22.08%)                 | 13.91  |
| APs-b      | 0.0067 | 789.52 (1.57)  | $S_0 \rightarrow S_1$    | H-1→L+1 (40.86%)<br>H→L+1 (38.74%)                   | 11.50  |
|            | 0.2273 | 517.66 (2.40)  | $S_0 \rightarrow S_4$    | H-1→L+1 (29.08%)<br>H-1→L (20.78%)<br>H→L+2 (34.74%) | 139.33 |
|            | 0.3287 | 454.54 (2.73)  | $S_0 \rightarrow S_5$    | H-2→L (21.88%)<br>H-1→L (20.96%)                     | 79.42  |
|            | 0.5310 | 404.62 (3.06)  | $S_0 \rightarrow S_6$    | H-2→L (50.50%)                                       | 71.51  |
| APs-c      | 0.0110 | 1096.80 (1.13) | $S_0 \rightarrow S_1$    | H→L+1 (54.88%)<br>H-1→L (43.02%)                     | 17.4   |
|            | 0.0170 | 978.48 (1.27)  | $S_0 \rightarrow S_2$    | H→L (82.80%)<br>H-1→L+1 (15.22%)<br>H-1→L+1 (62.94%) | 86.18  |
|            | 0.5587 | 533.78 (2.32)  | $S_0 \rightarrow S_4$    | H→L+2 (22.88%)<br>H→L (13.16%)                       | 257.24 |
|            | 0.4245 | 428.76 (2.89)  | $S_0 \rightarrow S_6$    | H→L+2 (39.66%)<br>H-2→L (36.62%)                     | 158.30 |
|            | 0.2548 | 416.49 (2.98)  | $S_0 \rightarrow S_8$    | H-2→L (48.68%)<br>H→L+2 (24.88%)                     | 84.26  |
| Mg-APs-a   | 0.0178 | 761.28 (1.63)  | $S_0 \rightarrow S_1$    | H→L (89.92%)                                         | 6.34   |
|            | 0.1617 | 469.75 (2.64)  | $S_0 \rightarrow S_4$    | H→L+1 (59.06%)<br>H→L+2 (24.24%)                     | 89.43  |
|            | 1.2101 | 403.41 (3.07)  | $S_0 \rightarrow S_7$    | H→L+2 (52.20%)<br>H-1→L (26.22%)                     | 161.48 |
| Zn-APs-a   | 0.0183 | 705.94 (1.76)  | $S_0 \rightarrow S_1$    | H→L (88.98%)                                         | 5.56   |
|            | 0.1407 | 557.82 (2.22)  | $S_0 \rightarrow S_3$    | H-1→L (64.86%)<br>H→L+1 (21.88%)                     | 47.89  |
|            | 0.1377 | 474.22 (2.61)  | $S_0 \rightarrow S_5$    | H→L+1 (69.48%)                                       | 83.27  |
|            | 0.9603 | 399.81 (3.10)  | $S_0 \rightarrow S_8$    | H→L+2 (58.22%)<br>H-1→L (21.30%)                     | 124.96 |



|           |        |                |                       |                                                      |        |
|-----------|--------|----------------|-----------------------|------------------------------------------------------|--------|
| Mg-APs-b  | 0.0230 | 896.50 (1.38)  | $S_0 \rightarrow S_1$ | H→L (64.16%)                                         | 66.60  |
|           | 0.1297 | 516.13 (2.40)  | $S_0 \rightarrow S_4$ | H→L+2 (48.04%)<br>H-1→L+1 (27.90%)                   | 60.85  |
|           | 0.4939 | 345.98 (2.64)  | $S_0 \rightarrow S_5$ | H-1→L+1 (42.64%)<br>H→L+2 (23.60%)                   | 127.83 |
| Zn-APs-b  | 0.0120 | 830.63 (1.49)  | $S_0 \rightarrow S_1$ | H→L (50.08%)<br>H-1→L+1 (22.70%)<br>H-1→L (20.08%)   | 115.00 |
|           | 0.0530 | 682.73 (1.82)  | $S_0 \rightarrow S_2$ | H→L+1 (87.52%)                                       | 126.17 |
|           | 0.3048 | 511.39 (2.42)  | $S_0 \rightarrow S_5$ | H-1→L+1 (46.32%)<br>H-1→L+2 (25.86%)                 | 332.28 |
|           | 0.2320 | 465.98 (2.66)  | $S_0 \rightarrow S_6$ | H-1→L+2 (34.82%)<br>H-2→L+1 (25.10%)                 | 209.57 |
| Mg-APs-c  | 0.0332 | 1094.58 (1.13) | $S_0 \rightarrow S_1$ | H→L+1 (86.02%)                                       | 56.10  |
|           | 0.3193 | 563.49 (2.20)  | $S_0 \rightarrow S_4$ | H-1→L+1 (57.48%)<br>H→L+2 (31.52%)                   | 142.47 |
|           | 0.8645 | 438.44 (2.83)  | $S_0 \rightarrow S_7$ | H→L+2 (55.96%)<br>H-1→L+1 (30.54%)                   | 188.08 |
| Zn-APs-c  | 0.0239 | 977.32 (1.27)  | $S_0 \rightarrow S_1$ | H→L+1 (71.64%)<br>H-1→L (24.16%)                     | 28.10  |
|           | 0.3943 | 543.77 (2.28)  | $S_0 \rightarrow S_5$ | H-1→L+1 (60.88%)<br>H→L+2 (25.76%)                   | 172.24 |
|           | 0.7253 | 428.32 (2.89)  | $S_0 \rightarrow S_8$ | H→L+2 (58.76%)<br>H-1→L+1 (24.56%)                   | 155.47 |
| Mg-APs-ab | 0.0215 | 742.50 (1.67)  | $S_0 \rightarrow S_1$ | H→L+1 (75.38%)                                       | 4.85   |
|           | 0.3652 | 524.32 (2.36)  | $S_0 \rightarrow S_6$ | H-1→L (54.12%)<br>H-1→L+2 (27.70%)<br>H→L+3 (28.44%) | 46.89  |
|           | 0.3297 | 477.26 (2.60)  | $S_0 \rightarrow S_8$ | H-1→L+2 (26.20%)<br>H-1→L (21.58%)                   | 54.37  |
| Zn-APs-ab | 0.0002 | 991.51 (1.25)  | $S_0 \rightarrow S_1$ | H→L (80.98%)                                         | 0.69   |
|           | 0.4179 | 497.42 (2.49)  | $S_0 \rightarrow S_9$ | H-1→L (39.74%)<br>H-2→L+3 (19.28%)                   | 57.11  |

**Table S2** Predicted major  $\beta_{ijk}$  [ $i, j, k \in (x, y, z)$ ] ( $\times 10^{-30}$  esu) of APs-hep/pen and APs-a/b/c, and the related molecular properties with important contributions to the  $\beta_{ijk}$  according to the SOS model. [ $n=0$  is the ground state;  $n>0$  is the  $n$ th excited state].  $\Delta\mu_{0n}$ : the dipole moment difference between the ground state and the  $n$ th excited state.  $\mu_{0n}$ : the transition moment between the ground state and the  $n$ th excited state.  $E$ : the transition energy.

| compounds | Transition            | $\Delta\mu_{0n}/\text{Debye}$ | $\mu_{0n}/\text{Debye}$ | $E_t/\text{eV}$ | $\beta_{ijk}/10^{-30}$ esu |
|-----------|-----------------------|-------------------------------|-------------------------|-----------------|----------------------------|
| APs-hep   | $S_0 \rightarrow S_4$ | -2.82                         | -9.68                   | 3.28            | 55.68 ( $\beta_{xxx}$ )    |
|           | $S_0 \rightarrow S_5$ | 2.25                          | -5.38                   | 3.46            | -12.77 ( $\beta_{xxx}$ )   |
|           | $S_0 \rightarrow S_6$ | 7.87                          | -4.27                   | 3.56            | -26.50 ( $\beta_{xxx}$ )   |
|           | $S_0 \rightarrow S_7$ | -0.25                         | -0.37                   | 3.62            | -19.05 ( $\beta_{yyy}$ )   |
|           |                       | 23.31                         | 3.70                    |                 |                            |
| APs-pen   | $S_0 \rightarrow S_4$ | -10.45                        | -10.25                  | 3.24            | 245.17 ( $\beta_{xxx}$ )   |
| APs-a     | $S_0 \rightarrow S_5$ | 7.96                          | 9.89                    | 3.10            | -189.45 ( $\beta_{zzz}$ )  |
| APs-b     | $S_0 \rightarrow S_4$ | -13.97                        | -5.01                   | 2.40            | 142.64 ( $\beta_{xxx}$ )   |
|           | $S_0 \rightarrow S_5$ | -7.84                         | 5.65                    | 2.73            | 78.53 ( $\beta_{xxx}$ )    |
|           | $S_0 \rightarrow S_6$ | -5.89                         | -6.76                   | 3.06            | 67.00 ( $\beta_{xxx}$ )    |
|           | $S_0 \rightarrow S_2$ | -16.71                        | 1.88                    | 1.27            | 86.17 ( $\beta_{yyy}$ )    |
| APs-c     | $S_0 \rightarrow S_4$ | -9.34                         | 7.97                    | 2.32            | 257.25 ( $\beta_{yyy}$ )   |
|           | $S_0 \rightarrow S_6$ | -14.59                        | -6.23                   | 2.89            | 158.30 ( $\beta_{yyy}$ )   |
|           | $S_0 \rightarrow S_8$ | -14.11                        | 4.76                    | 2.98            | 84.27 ( $\beta_{yyy}$ )    |
|           | $S_0 \rightarrow S_1$ | 12.72                         | 2.10                    | 1.38            | -68.29 ( $\beta_{yyy}$ )   |
| Mg-APs-b  | $S_0 \rightarrow S_4$ | 10.86                         | -3.78                   | 2.40            | -62.92 ( $\beta_{yyy}$ )   |
|           | $S_0 \rightarrow S_5$ | 7.64                          | -7.03                   | 2.64            | -126.86 ( $\beta_{yyy}$ )  |
|           | $S_0 \rightarrow S_1$ | 16.80                         | -2.56                   | 1.49            | -115.26 ( $\beta_{yyy}$ )  |
|           |                       | 13.72                         | -4.78                   |                 | -69.74 ( $\beta_{yxx}$ )   |
| Zn-APs-b  | $S_0 \rightarrow S_2$ | -1.27                         | -2.31                   | 1.82            |                            |
|           |                       | 13.82                         | -2.31                   |                 | -51.72 ( $\beta_{yyy}$ )   |
|           | $S_0 \rightarrow S_5$ | 15.73                         | 7.30                    | 2.42            | -331.57 ( $\beta_{yyy}$ )  |
|           | $S_0 \rightarrow S_6$ | 9.39                          | -8.23                   | 2.66            | -207.64 ( $\beta_{yyy}$ )  |

**(1) APs-hep:**

$\beta_{xxx}(S_0 \rightarrow S_4)$

$$\beta_{xxx} = 6 \frac{r_{04}^x (r_{44}^x - r_{00}^x) r_{40}^x}{E_4^2} = 6 \times \frac{-9.68 \times [-4.39 - (-1.47)] \times 9.68}{3.39^2} \times \frac{(10^{-18})^3}{(1.602 \times 10^{-12})^2} = 55.66 \times 10^{-30} \text{ esu}$$

$\beta_{xxx}(S_0 \rightarrow S_5)$

$$\beta_{xxx} = 6 \frac{r_{05}^x (r_{55}^x - r_{00}^x) r_{50}^x}{E_5^2} = 6 \times \frac{-5.38 \times [0.78 - (-1.47)] \times 5.38}{3.46^2} \times \frac{(10^{-18})^3}{(1.602 \times 10^{-12})^2} = -12.72 \times 10^{-30} \text{ esu}$$

$\beta_{xxx}(S_0 \rightarrow S_6)$

$$\beta_{xxx} = 6 \frac{r_{06}^x (r_{66}^x - r_{00}^x) r_{60}^x}{E_6^2} = 6 \times \frac{-4.27 \times [6.40 - (-1.47)] \times 4.27}{3.56^2} \times \frac{(10^{-18})^3}{(1.602 \times 10^{-12})^2} = -26.47 \times 10^{-30} \text{ esu}$$

$\beta_{XYX}(S_0 \rightarrow S_7)$

$$\beta_{XYX} = 4 \frac{r_{07}^X(r_{77}^Y - r_{00}^Y)r_{70}^X}{E_7^2} + 2 \frac{r_{07}^Y(r_{77}^X - r_{00}^X)r_{70}^Y}{E_7^2} = 4 \times \frac{-0.37 \times [-0.30 - (-0.05)] \times 0.37}{3.62^2} \times \frac{(10^{-18})^3}{(1.602 \times 10^{-12})^2} \\ + 2 \times \frac{3.70 \times [21.84 - (-1.47)] \times (-3.70)}{3.62^2} \times \frac{(10^{-18})^3}{(1.602 \times 10^{-12})^2} = -18.97 \times 10^{-30} \text{ esu}$$

**(2) APs-pen:**

$\beta_{XXX}(S_0 \rightarrow S_4)$

$$\beta_{XXX} = 6 \frac{r_{04}^X(r_{44}^X - r_{00}^X)r_{40}^X}{E_4^2} = 6 \times \frac{-10.25 \times [-8.47 - 1.98] \times 10.25}{3.24^2} \times \frac{(10^{-18})^3}{(1.602 \times 10^{-12})^2} = 244.51 \times 10^{-30} \text{ esu}$$

**(3) APs-a:**

$\beta_{ZZZ}(S_0 \rightarrow S_5)$

$$\beta_{ZZZ} = 6 \frac{r_{05}^Z(r_{55}^Z - r_{00}^Z)r_{50}^Z}{E_5^2} = 6 \times \frac{9.89 \times [3.15 - (-4.81)] \times (-9.89)}{(3.10)^2} \times \frac{(10^{-18})^3}{(1.602 \times 10^{-12})^2} = -190.13 \times 10^{-30} \text{ esu}$$

**(4) APs-b:**

$\beta_{XXX}(S_0 \rightarrow S_4)$

$$\beta_{XXX} = 6 \frac{r_{04}^X(r_{44}^X - r_{00}^X)r_{40}^X}{E_4^2} = 6 \times \frac{-5.01 \times (-6.28 - 7.69) \times 5.01}{2.40^2} \times \frac{(10^{-18})^3}{(1.602 \times 10^{-12})^2} = 142.32 \times 10^{-30} \text{ esu}$$

$\beta_{XXX}(S_0 \rightarrow S_5)$

$$\beta_{XXX} = 6 \frac{r_{05}^X(r_{55}^X - r_{00}^X)r_{50}^X}{E_5^2} = 6 \times \frac{5.65 \times (-0.15 - 7.69) \times (-5.65)}{2.73^2} \times \frac{(10^{-18})^3}{(1.602 \times 10^{-12})^2} = 78.51 \times 10^{-30} \text{ esu}$$

$\beta_{XXX}(S_0 \rightarrow S_6)$

$$\beta_{XXX} = 6 \frac{r_{06}^X(r_{66}^X - r_{00}^X)r_{60}^X}{E_6^2} = 6 \times \frac{-6.76 \times (1.80 - 7.69) \times 6.76}{3.06^2} \times \frac{(10^{-18})^3}{(1.602 \times 10^{-12})^2} = 67.20 \times 10^{-30} \text{ esu}$$

**(5) APs-c:**

$\beta_{YYY}(S_0 \rightarrow S_2)$

$$\beta_{YYY} = 6 \frac{r_{02}^Y(r_{22}^Y - r_{00}^Y)r_{20}^Y}{E_2^2} = 6 \times \frac{1.88 \times (-6.70 - 10.01) \times -1.88}{1.27^2} \times \frac{(10^{-18})^3}{(1.602 \times 10^{-12})^2} = 85.61 \times 10^{-30} \text{ esu}$$

$\beta_{YYY}(S_0 \rightarrow S_4)$

$$\beta_{YYY} = 6 \frac{r_{04}^Y(r_{44}^Y - r_{00}^Y)r_{40}^Y}{E_4^2} = 6 \times \frac{7.97 \times (0.67 - 10.01) \times -7.97}{2.32^2} \times \frac{(10^{-18})^3}{(1.602 \times 10^{-12})^2} = 257.70 \times 10^{-30} \text{ esu}$$

$\beta_{YYY}(S_0 \rightarrow S_6)$

$$\beta_{YYY} = 6 \frac{r_{06}^Y(r_{66}^Y - r_{00}^Y)r_{60}^Y}{E_6^2} = 6 \times \frac{-6.23 \times (-4.58 - 10.01) \times 6.23}{2.89^2} \times \frac{(10^{-18})^3}{(1.602 \times 10^{-12})^2} = 157.64 \times 10^{-30} \text{ esu}$$

$\beta_{YYY}(S_0 \rightarrow S_8)$

$$\beta_{YYY} = 6 \frac{r_{08}^Y (r_{88}^Y - r_{00}^Y) r_{80}^Y}{E_8^2} = 6 \times \frac{4.76 \times (-4.10 - 10.01) \times (-4.76)}{2.98^2} \times \frac{(10^{-18})^3}{(1.602 \times 10^{-12})^2} = 84.17 \times 10^{-30} \text{ esu}$$

**(6) Mg-APs-b:**

$$\beta_{YYY} (S_0 \rightarrow S_1)$$

$$\beta_{YYY} = 6 \frac{r_{01}^Y (r_{11}^Y - r_{00}^Y) r_{10}^Y}{E_1^2} = 6 \times \frac{2.10 \times [5.37 - (-7.35)] \times (-2.10)}{1.38^2} \times \frac{(10^{-18})^3}{(1.602 \times 10^{-12})^2} = -68.86 \times 10^{-30} \text{ esu}$$

$$\beta_{YYY} (S_0 \rightarrow S_4)$$

$$\beta_{YYY} = 6 \frac{r_{04}^Y (r_{44}^Y - r_{00}^Y) r_{40}^Y}{E_4^2} = 6 \times \frac{-3.78 \times [3.51 - (-7.35)] \times 3.78}{2.40^2} \times \frac{(10^{-18})^3}{(1.602 \times 10^{-12})^2} = -62.98 \times 10^{-30} \text{ esu}$$

$$\beta_{YYY} (S_0 \rightarrow S_5)$$

$$\beta_{YYY} = 6 \frac{r_{05}^Y (r_{55}^Y - r_{00}^Y) r_{50}^Y}{E_5^2} = 6 \times \frac{-7.03 \times [0.29 - (-7.35)] \times 7.03}{2.64^2} \times \frac{(10^{-18})^3}{(1.602 \times 10^{-12})^2} = -126.62 \times 10^{-30} \text{ esu}$$

**(7) Zn-APs-b:**

$$\beta_{YYY} (S_0 \rightarrow S_1)$$

$$\beta_{YYY} = 6 \frac{r_{01}^Y (r_{11}^Y - r_{00}^Y) r_{10}^Y}{E_1^2} = 6 \times \frac{-2.56 \times [9.13 - (-7.76)] \times 2.56}{1.49^2} \times \frac{(10^{-18})^3}{(1.602 \times 10^{-12})^2} = -116.56 \times 10^{-30} \text{ esu}$$

$$\beta_{YYX} (S_0 \rightarrow S_2)$$

$$\beta_{YYX}$$

$$= 4 \frac{r_{02}^Y (r_{22}^Y - r_{00}^Y) r_{20}^X}{E_2^2} + 2 \frac{r_{02}^Y (r_{22}^X - r_{00}^X) r_{20}^Y}{E_2^2} = 4 \times \frac{-2.31 \times [6.06 - (-7.67)] \times 4.78}{1.82^2} \times \frac{(10^{-18})^3}{(1.602 \times 10^{-12})^2} - 2.31 \times [-2.78 - (-1.51)] \times 2.31 \times \frac{(10^{-18})^3}{(1.602 \times 10^{-12})^2} = -69.74 \times 10^{-30} \text{ esu}$$

$$\beta_{YYY} (S_0 \rightarrow S_2)$$

$$\beta_{YYY} = 6 \frac{r_{02}^Y (r_{22}^Y - r_{00}^Y) r_{20}^Y}{E_2^2} = 6 \times \frac{-2.31 \times [6.06 - (-7.76)] \times 2.31}{1.82^2} \times \frac{(10^{-18})^3}{(1.602 \times 10^{-12})^2} = -52.05 \times 10^{-30} \text{ esu}$$

$$\beta_{YYY} (S_0 \rightarrow S_5)$$

$$\beta_{YYY} = 6 \frac{r_{05}^Y (r_{55}^Y - r_{00}^Y) r_{50}^Y}{E_5^2} = 6 \times \frac{7.30 \times [7.97 - (-7.76)] \times (-7.30)}{2.42^2} \times \frac{(10^{-18})^3}{(1.602 \times 10^{-12})^2} = -334.63 \times 10^{-30} \text{ esu}$$

$$\beta_{YYY} (S_0 \rightarrow S_6)$$

$$\beta_{YYY} = 6 \frac{r_{06}^Y (r_{66}^Y - r_{00}^Y) r_{60}^Y}{E_6^2} = 6 \times \frac{-8.23 \times [1.63 - (-7.76)] \times 8.23}{2.66^2} \times \frac{(10^{-18})^3}{(1.602 \times 10^{-12})^2} = -210.15 \times 10^{-30} \text{ esu}$$

Cartesian coordinates of all studied compounds optimized with b3lyp/6-31G(d,p)

| APs-hep    |             |             | APs-pen     |   |             |             |             |
|------------|-------------|-------------|-------------|---|-------------|-------------|-------------|
| C          | 0.28052500  | 3.48952200  | 0.13199600  | C | 0.24050000  | -3.45894300 | -0.25718800 |
| C          | 1.28123500  | 2.55349600  | 0.10011700  | C | 1.23309400  | -2.53697000 | -0.22362200 |
| C          | -0.97622000 | 2.80275700  | 0.08207300  | C | -1.00976900 | -2.72042200 | -0.14825500 |
| C          | -5.72993600 | 2.52822300  | 0.10084300  | C | -5.78416400 | -2.53769600 | -0.08620000 |
| C          | -4.75622600 | 3.47175100  | 0.12601600  | C | -4.78616500 | -3.47816100 | -0.13819000 |
| C          | -3.48750900 | 2.74836100  | 0.09208100  | C | -3.52579800 | -2.79233800 | -0.11048400 |
| C          | -4.73083300 | -3.48434200 | -0.11056000 | C | -4.80997800 | 3.46839400  | 0.15705200  |
| C          | -5.72363300 | -2.53817700 | -0.06995600 | C | -5.78908400 | 2.53041700  | 0.12352900  |
| C          | -3.46695700 | -2.80453900 | -0.08832400 | C | -3.54520100 | 2.73854000  | 0.11631200  |
| C          | -5.10044000 | -1.24754200 | -0.02279500 | C | -5.11103800 | 1.23937500  | 0.06464400  |
| C          | 0.30330100  | -3.46483700 | -0.17909500 | C | 0.22021600  | 3.48157300  | 0.20310000  |
| C          | 1.28895200  | -2.53532100 | -0.14909400 | C | 1.22820600  | 2.55351400  | 0.16592100  |
| C          | -0.95451300 | -2.73227200 | -0.10929700 | C | -1.02991500 | 2.78829400  | 0.11564600  |
| C          | 0.62176500  | -1.23685000 | -0.05267100 | C | 0.63068400  | 1.25382900  | 0.03713200  |
| C          | 0.67160800  | 1.25490400  | 0.01938000  | C | 0.57875100  | -1.23670300 | -0.07827700 |
| C          | 1.30432000  | 0.00013100  | -0.01577500 | C | 1.27272900  | -0.00100800 | -0.01973800 |
| C          | -2.19729000 | -3.37620300 | -0.12442600 | C | -2.29738100 | 3.36854600  | 0.14570100  |
| C          | -2.24244600 | 3.38507800  | 0.10983400  | C | -2.25458700 | -3.35962000 | -0.16234000 |
| C          | -5.04482700 | 1.24011600  | 0.05322600  | C | -5.16737900 | -1.24489800 | -0.02654900 |
| C          | -5.70555400 | 0.00700800  | 0.01996000  | C | -5.77502700 | 0.00819300  | 0.02477800  |
| H          | -2.17625900 | -4.46064300 | -0.17571200 | H | -2.30418600 | 4.45262800  | 0.21003900  |
| H          | -6.79087400 | 0.01999400  | 0.02605500  | H | -6.86030100 | 0.02150300  | 0.03195300  |
| H          | -2.25171900 | 4.46992200  | 0.15631200  | H | -2.23411700 | -4.44319500 | -0.23167400 |
| N          | -3.69050300 | 1.40277900  | 0.04756800  | N | -3.81090500 | -1.45360100 | -0.03904900 |
| N          | -0.68742600 | 1.46204000  | 0.01205800  | N | -0.77892500 | -1.37823400 | -0.04685000 |
| N          | -0.73594100 | -1.38734600 | -0.03627600 | N | -0.72942600 | 1.45145500  | 0.01543000  |
| N          | -3.74524800 | -1.46336300 | -0.03313700 | N | -3.75583900 | 1.39506400  | 0.05880600  |
| H          | -4.86303200 | 4.54836700  | 0.16329800  | H | -4.89316700 | -4.55279000 | -0.19344600 |
| H          | -6.80331900 | 2.66789100  | 0.11380500  | H | -6.85225500 | -2.70595800 | -0.09192200 |
| H          | -6.79257100 | -2.70091500 | -0.07419300 | H | -6.86169100 | 2.67597200  | 0.13858800  |
| H          | -4.84350500 | -4.55891800 | -0.15353100 | H | -4.91096600 | 4.54522700  | 0.20428500  |
| H          | 0.39874200  | -4.54082400 | -0.25002000 | H | 0.31552700  | 4.55453000  | 0.29824000  |
| H          | 2.35613200  | -2.69538100 | -0.19542600 | H | 2.28972700  | 2.73315900  | 0.23282500  |
| H          | 2.34574500  | 2.72860500  | 0.13248400  | H | 2.29704000  | -2.70069200 | -0.30334100 |
| H          | 0.38509400  | 4.56401600  | 0.19349500  | H | 0.32664400  | -4.53318100 | -0.36013500 |
| C          | 2.80923200  | -0.00472800 | -0.00815800 | C | 7.97947300  | -0.00896200 | 0.03275900  |
| C          | 3.42464500  | -0.49766100 | 1.15716600  | C | 7.37696000  | -0.79439200 | 1.02053200  |
| C          | 3.44230500  | 0.48757600  | -1.16406600 | C | 7.39524400  | 0.77666200  | -0.96552200 |
| C          | 4.78151400  | -0.62687200 | 1.46370200  | C | 6.01732400  | -1.00353100 | 1.26215000  |
| H          | 2.73960400  | -0.81787200 | 1.93690400  | H | 8.05896500  | -1.31621100 | 1.68731300  |
| C          | 4.80378700  | 0.61275400  | -1.45245000 | C | 6.04006100  | 0.98690700  | -1.23113500 |
| H          | 2.76928500  | 0.80887100  | -1.95384800 | H | 8.08929000  | 1.29745000  | -1.62059100 |
| C          | 5.89976200  | -0.30117800 | 0.70215400  | C | 4.91608000  | -0.47973600 | 0.58667100  |
| H          | 4.99568300  | -1.03950400 | 2.44907200  | H | 5.78067100  | -1.67054000 | 2.09024200  |
| C          | 5.91025500  | 0.28480600  | -0.67530800 | C | 4.92685900  | 0.46511500  | -0.57445700 |
| H          | 5.03248200  | 1.02425700  | -2.43505000 | H | 5.81885300  | 1.65321300  | -2.06410700 |
| C          | 7.24323300  | -0.45910200 | 1.08190800  | C | 3.57002900  | -0.73568100 | 0.88199200  |
| C          | 7.25953700  | 0.44020000  | -1.03578600 | C | 3.58597400  | 0.72289100  | -0.89229800 |
| H          | 7.58211800  | -0.86083900 | 2.02860700  | H | 3.21183700  | -1.36155200 | 1.68915400  |
| C          | 8.05746200  | -0.01015800 | 0.02881900  | C | 2.75226100  | -0.00637900 | -0.01241200 |
| H          | 7.61272500  | 0.84098500  | -1.97765600 | H | 3.24351200  | 1.34580900  | -1.70873700 |
| H          | 9.14176000  | -0.01126100 | 0.03667400  | H | 9.06779400  | -0.00947000 | 0.04234100  |
| H          | -1.36517200 | 0.70705200  | -0.01822300 | H | -3.13509100 | -0.69685200 | -0.00058400 |
| H          | -3.06140500 | -0.71397900 | -0.00361900 | H | -1.39616900 | 0.68729300  | -0.03631100 |
| Mg-APs-hep |             |             | Zn-APs-hep  |   |             |             |             |
| C          | 0.00000000  | 3.49675300  | -0.40388400 | C | -0.07629800 | 3.48392300  | -0.54527600 |

|    |             |             |             |    |             |             |             |
|----|-------------|-------------|-------------|----|-------------|-------------|-------------|
| C  | -0.01142300 | 2.54520700  | -1.38074400 | C  | -0.06357000 | 2.53281000  | -1.51996400 |
| C  | 0.02636100  | 2.80359400  | 0.86180200  | C  | -0.03950000 | 2.79112500  | 0.71879100  |
| C  | 0.02797200  | 2.53075200  | 5.61430200  | C  | -0.03969800 | 2.51958500  | 5.45004300  |
| C  | 0.03740200  | 3.49382100  | 4.64720900  | C  | -0.05429100 | 3.48177800  | 4.48478600  |
| C  | 0.03078300  | 2.81020800  | 3.37266000  | C  | -0.04214200 | 2.79749700  | 3.21222500  |
| C  | -0.03740200 | -3.49382100 | 4.64720900  | C  | 0.05429100  | -3.48177800 | 4.48478600  |
| C  | -0.02797200 | -2.53075200 | 5.61430200  | C  | 0.03969800  | -2.51958500 | 5.45004300  |
| C  | -0.03078300 | -2.81020800 | 3.37266000  | C  | 0.04214200  | -2.79749700 | 3.21222500  |
| C  | -0.01470000 | -1.25260600 | 4.93707900  | C  | 0.01940000  | -1.24420900 | 4.77076300  |
| C  | 0.00000000  | -3.49675300 | -0.40388400 | C  | 0.07629800  | -3.48392300 | -0.54527600 |
| C  | 0.01142300  | -2.54520700 | -1.38074400 | C  | 0.06357000  | -2.53281000 | -1.51996400 |
| C  | -0.02636100 | -2.80359400 | 0.86180200  | C  | 0.03950000  | -2.79112500 | 0.71879100  |
| C  | -0.01705800 | -1.25550500 | -0.71888000 | C  | 0.01040400  | -1.24685600 | -0.85548000 |
| C  | 0.01705800  | 1.25550500  | -0.71888000 | C  | -0.01040400 | 1.24685600  | -0.85548000 |
| C  | 0.00000000  | 0.00000000  | -1.36726100 | C  | 0.00000000  | 0.00000000  | -1.50824100 |
| C  | -0.03244100 | -3.42570300 | 2.11633100  | C  | 0.05194000  | -3.41880500 | 1.96468400  |
| C  | 0.03244100  | 3.42570300  | 2.11633100  | C  | -0.05194000 | 3.41880500  | 1.96468400  |
| C  | 0.01470000  | 1.25260600  | 4.93707900  | C  | -0.01940000 | 1.24420900  | 4.77076300  |
| C  | 0.00000000  | 0.00000000  | 5.56167100  | C  | 0.00000000  | 0.00000000  | 5.40044500  |
| H  | -0.03422200 | -4.51179200 | 2.11133400  | H  | 0.07592700  | -4.50430000 | 1.95986800  |
| H  | 0.00000000  | 0.00000000  | 6.64768500  | H  | 0.00000000  | 0.00000000  | 6.48613700  |
| H  | 0.03422200  | 4.51179200  | 2.11133400  | H  | -0.07592700 | 4.50430000  | 1.95986800  |
| N  | 0.01740400  | 1.45410100  | 3.57941600  | N  | -0.02163700 | 1.43939800  | 3.41122500  |
| N  | 0.03500400  | 1.44705800  | 0.64249700  | N  | 0.00000000  | 1.43323700  | 0.50804900  |
| N  | -0.03500400 | -1.44705800 | 0.64249700  | N  | 0.00000000  | -1.43323700 | 0.50804900  |
| N  | -0.01740400 | -1.45410100 | 3.57941600  | N  | 0.02163700  | -1.43939800 | 3.41122500  |
| H  | 0.04795100  | 4.56815500  | 4.77714700  | H  | -0.07109000 | 4.55636600  | 4.61102100  |
| H  | 0.02914800  | 2.66543200  | 6.68812300  | H  | -0.04256400 | 2.64938500  | 6.52435500  |
| H  | -0.02914800 | -2.66543200 | 6.68812300  | H  | 0.04256400  | -2.64938500 | 6.52435500  |
| H  | -0.04795100 | -4.56815500 | 4.77714700  | H  | 0.07109000  | -4.55636600 | 4.61102100  |
| H  | 0.01648700  | -4.57206000 | -0.52476100 | H  | 0.11513900  | -4.55888600 | -0.66301700 |
| H  | 0.04183700  | -2.69836900 | -2.44934400 | H  | 0.09276100  | -2.68040200 | -2.58928100 |
| H  | -0.04183700 | 2.69836900  | -2.44934400 | H  | -0.09276100 | 2.68040200  | -2.58928100 |
| H  | -0.01648700 | 4.57206000  | -0.52476100 | H  | -0.11513900 | 4.55888600  | -0.66301700 |
| C  | 0.00000000  | 0.00000000  | -2.87404400 | Zn | 0.00000000  | 0.00000000  | 1.96126800  |
| C  | 1.19230100  | 0.40907900  | -3.49852700 | C  | 0.00000000  | 0.00000000  | -3.01517100 |
| C  | -1.19230100 | -0.40907900 | -3.49852700 | C  | 1.19361500  | 0.40591300  | -3.63839700 |
| C  | 1.49855500  | 0.51396000  | -4.85772300 | C  | -1.19361500 | -0.40591300 | -3.63839700 |
| H  | 1.99688100  | 0.67648900  | -2.81935100 | C  | 1.50030500  | 0.51004900  | -4.99767200 |
| C  | -1.49855500 | -0.51396000 | -4.85772300 | H  | 1.99826900  | 0.67192700  | -2.95871200 |
| H  | -1.99688100 | -0.67648900 | -2.81935100 | C  | -1.50030500 | -0.51004900 | -4.99767200 |
| C  | 0.70805100  | 0.24230300  | -5.97018200 | H  | -1.99826900 | -0.67192700 | -2.95871200 |
| H  | 2.50933400  | 0.85518500  | -5.07920800 | C  | 0.70880600  | 0.24046200  | -6.10983500 |
| C  | -0.70805100 | -0.24230300 | -5.97018200 | H  | 2.51180300  | 0.84900400  | -5.21924300 |
| H  | -2.50933400 | -0.85518500 | -5.07920800 | C  | -0.70880600 | -0.24046200 | -6.10983500 |
| C  | 1.08869600  | 0.37152200  | -7.31667600 | H  | -2.51180300 | -0.84900400 | -5.21924300 |
| C  | -1.08869600 | -0.37152200 | -7.31667600 | C  | 1.08966100  | 0.36869500  | -7.45635400 |
| H  | 2.05960500  | 0.70344400  | -7.66262800 | C  | -1.08966100 | -0.36869500 | -7.45635400 |
| C  | 0.00000000  | 0.00000000  | -8.12279100 | H  | 2.06142600  | 0.69805500  | -7.80232400 |
| H  | -2.05960500 | -0.70344400 | -7.66262800 | C  | 0.00000000  | 0.00000000  | -8.26243100 |
| H  | 0.00000000  | 0.00000000  | -9.20713000 | H  | -2.06142600 | -0.69805500 | -7.80232400 |
| Mg | 0.00000000  | 0.00000000  | 2.11261500  | H  | 0.00000000  | 0.00000000  | -9.34676500 |

#### Mg-APs-pen

|   |             |             |             |
|---|-------------|-------------|-------------|
| C | 2.11665300  | 1.38638200  | 5.66564000  |
| C | 2.92316100  | 1.91155800  | 4.69770200  |
| C | 1.04660300  | 0.68674700  | 4.98937900  |
| C | -2.92316100 | -1.91155800 | 4.69770200  |
| C | -2.11665300 | -1.38638200 | 5.66564000  |
| C | -1.04660300 | -0.68674700 | 4.98937900  |
| C | -2.17488500 | -1.33017200 | -1.32861900 |
| C | -2.96670700 | -1.85371500 | -0.34943300 |
| C | -1.05399700 | -0.68558300 | -0.67287400 |
| C | -2.35178400 | -1.52367400 | 0.91253800  |

#### Zn-APs-pen

|   |             |             |             |
|---|-------------|-------------|-------------|
| C | -2.14306300 | 1.32477600  | 5.49789500  |
| C | -2.96170700 | 1.83013400  | 4.53215400  |
| C | -1.05798100 | 0.65414800  | 4.81917200  |
| C | 2.96170700  | -1.83013400 | 4.53215400  |
| C | 2.14306300  | -1.32477600 | 5.49789500  |
| C | 1.05798100  | -0.65414800 | 4.81917200  |
| C | 2.18801600  | -1.28473800 | -1.47116400 |
| C | 2.99221700  | -1.78815000 | -0.49424000 |
| C | 1.05961300  | -0.65974600 | -0.81246200 |
| C | 2.37413900  | -1.46433600 | 0.76631700  |

|    |             |             |             |    |             |             |             |
|----|-------------|-------------|-------------|----|-------------|-------------|-------------|
| C  | 2.17488500  | 1.33017200  | -1.32861900 | C  | -2.18801600 | 1.28473800  | -1.47116400 |
| C  | 2.96670700  | 1.85371500  | -0.34943300 | C  | -2.99221700 | 1.78815000  | -0.49424000 |
| C  | 1.05399700  | 0.68558300  | -0.67287400 | C  | -1.05961300 | 0.65974600  | -0.81246200 |
| C  | 2.35178400  | 1.52367400  | 0.91253800  | C  | -2.37413900 | 1.46433600  | 0.76631700  |
| C  | 2.34997400  | 1.53668700  | 3.42414100  | C  | -2.37839600 | 1.47087900  | 3.26031300  |
| C  | 2.86981400  | 1.86472900  | 2.16765200  | C  | -2.90775400 | 1.79347100  | 2.01234600  |
| C  | 0.00000000  | 0.00000000  | -1.32901300 | C  | 0.00000000  | 0.00000000  | -1.47302300 |
| C  | 0.00000000  | 0.00000000  | 5.61498100  | C  | 0.00000000  | 0.00000000  | 5.44937100  |
| C  | -2.34997400 | -1.53668700 | 3.42414100  | C  | 2.37839600  | -1.47087900 | 3.26031300  |
| C  | -2.86981400 | -1.86472900 | 2.16765200  | C  | 2.90775400  | -1.79347100 | 2.01234600  |
| H  | -3.78760800 | -2.44564200 | 2.16284400  | H  | 3.83795400  | -2.35363000 | 2.00685300  |
| H  | 0.00000000  | 0.00000000  | 6.70100300  | H  | 0.00000000  | 0.00000000  | 6.53507800  |
| H  | 3.78760800  | 2.44564200  | 2.16284400  | H  | -3.83795400 | 2.35363000  | 2.00685300  |
| N  | -1.21385800 | -0.79619800 | 3.63144900  | N  | 1.22331200  | -0.75668300 | 3.45941600  |
| N  | 1.21385800  | 0.79619800  | 3.63144900  | N  | -1.22331200 | 0.75668300  | 3.45941600  |
| N  | 1.19599700  | 0.81330300  | 0.68832900  | N  | -1.20232300 | 0.77666700  | 0.55102000  |
| N  | -1.19599700 | -0.81330300 | 0.68832900  | N  | 1.20232300  | -0.77666700 | 0.55102000  |
| H  | -2.22989000 | -1.46045200 | 6.73942700  | H  | 2.25413200  | -1.39265600 | 6.57220600  |
| H  | -3.82335800 | -2.49838700 | 4.82646900  | H  | 3.87629800  | -2.39475000 | 4.65775500  |
| H  | -3.89293400 | -2.40112700 | -0.46663900 | H  | 3.92811700  | -2.31927500 | -0.60841600 |
| H  | -2.33637000 | -1.36391900 | -2.39524400 | H  | 2.34241900  | -1.31806700 | -2.53870200 |
| H  | 2.33637000  | 1.36391900  | -2.39524400 | H  | -2.34241900 | 1.31806700  | -2.53870200 |
| H  | 3.89293400  | 2.40112700  | -0.46663900 | H  | -3.92811700 | 2.31927500  | -0.60841600 |
| H  | 3.82335800  | 2.49838700  | 4.82646900  | H  | -3.87629800 | 2.39475000  | 4.65775500  |
| H  | 2.22989000  | 1.46045200  | 6.73942700  | H  | -2.25413200 | 1.39265600  | 6.57220600  |
| C  | 0.00000000  | 0.00000000  | -2.81132700 | Zn | 0.00000000  | 0.00000000  | 2.00606700  |
| C  | 0.02272800  | 1.14790400  | -3.63674800 | C  | 0.00000000  | 0.00000000  | -2.95594500 |
| C  | -0.02272800 | -1.14790400 | -3.63674800 | C  | -0.02171100 | 1.14803200  | -3.78037200 |
| H  | 0.01379400  | 2.17181000  | -3.28542000 | C  | 0.02171100  | -1.14803200 | -3.78037200 |
| H  | -0.01379400 | -2.17181000 | -3.28542000 | H  | -0.01337900 | 2.17178800  | -3.42871700 |
| C  | 0.01070200  | 0.74869100  | -4.98060300 | H  | 0.01337900  | -2.17178800 | -3.42871700 |
| C  | -0.01070200 | -0.74869100 | -4.98060300 | C  | -0.01031700 | 0.74868300  | -5.12447100 |
| C  | -0.00759100 | -1.59520900 | -6.08780200 | C  | 0.01031700  | -0.74868300 | -5.12447100 |
| C  | 0.00000000  | -1.26611400 | -7.44536600 | C  | 0.00733100  | -1.59517900 | -6.23152700 |
| C  | 0.00000000  | 0.00000000  | -8.03876300 | C  | 0.00000000  | -1.26612500 | -7.58915100 |
| C  | 0.00000000  | 1.26611400  | -7.44536600 | C  | 0.00000000  | 0.00000000  | -8.18245400 |
| C  | 0.00759100  | 1.59520900  | -6.08780200 | C  | 0.00000000  | 1.26612500  | -7.58915100 |
| H  | 0.01551800  | 2.66025100  | -5.85892700 | C  | -0.00733100 | 1.59517900  | -6.23152700 |
| H  | -0.00122300 | 2.10790000  | -8.13345400 | H  | -0.01480200 | 2.66021700  | -6.00263400 |
| H  | 0.00000000  | 0.00000000  | -9.12715300 | H  | 0.00124600  | 2.10790600  | -8.27722300 |
| H  | 0.00122300  | -2.10790000 | -8.13345400 | H  | 0.00000000  | 0.00000000  | -9.27084000 |
| H  | -0.01551800 | -2.66025100 | -5.85892700 | H  | -0.00124600 | -2.10790600 | -8.27722300 |
| Mg | 0.00000000  | 0.00000000  | 2.15738400  | H  | 0.01480200  | -2.66021700 | -6.00263400 |

**APs-a**

|   |            |             |             |
|---|------------|-------------|-------------|
| C | 0.00000000 | 0.68170700  | 5.32543600  |
| C | 0.00000000 | -0.68170700 | 5.32543600  |
| C | 0.00000000 | 1.13498200  | 3.95340400  |
| C | 0.00000000 | 4.31180600  | 0.41659100  |
| C | 0.00000000 | 4.30493800  | 1.77233800  |
| C | 0.00000000 | 2.89441500  | 2.16991900  |
| C | 0.00000000 | 0.00000000  | -6.25292700 |
| C | 0.00000000 | -1.25925900 | -5.64974500 |
| C | 0.00000000 | -1.58098200 | -4.28850000 |
| C | 0.00000000 | 1.25925900  | -5.64974500 |
| C | 0.00000000 | -0.73694700 | -3.18176100 |
| C | 0.00000000 | 1.58098200  | -4.28850000 |
| C | 0.00000000 | 0.73694700  | -3.18176100 |
| H | 0.00000000 | 0.00000000  | -7.34053400 |
| H | 0.00000000 | -2.10730600 | -6.32992800 |
| H | 0.00000000 | -2.64562800 | -4.06831600 |
| H | 0.00000000 | 2.10730600  | -6.32992800 |
| H | 0.00000000 | 2.64562800  | -4.06831600 |
| C | 0.00000000 | -1.16266000 | -1.80481800 |

**APs-b**

|   |             |             |             |
|---|-------------|-------------|-------------|
| C | -0.47187500 | -4.20133800 | -0.00105100 |
| C | -1.83417200 | -4.20588100 | -0.00178300 |
| C | -0.01790100 | -2.82674000 | -0.00746200 |
| C | 3.23730700  | 0.72449000  | 0.00566900  |
| C | 3.22134500  | -0.74392800 | -0.00077700 |
| C | 1.81712000  | -1.09854400 | 0.00107300  |
| C | -1.74199300 | 4.27614700  | -0.03855600 |
| C | -0.38787600 | 4.28706700  | -0.03555300 |
| C | -2.20974900 | 2.86913100  | 0.01359700  |
| C | 0.08314400  | 2.88754900  | 0.01568700  |
| C | -5.41766700 | 0.73162100  | 0.00388200  |
| C | -5.44294200 | -0.62695700 | 0.00147500  |
| C | -4.00909000 | 1.11938800  | 0.00617900  |
| C | -4.04424700 | -1.05286700 | -0.00061400 |
| C | -2.29190400 | -2.83679200 | -0.00849900 |
| C | -3.60441100 | -2.39895800 | -0.00599200 |
| C | -3.55526300 | 2.43666500  | 0.00760700  |
| C | 1.30491400  | -2.42157900 | -0.00439200 |
| C | 1.85957200  | 1.11456700  | 0.01040700  |

|   |            |             |             |   |             |             |             |
|---|------------|-------------|-------------|---|-------------|-------------|-------------|
| C | 0.00000000 | 1.16266000  | -1.80481800 | C | 1.39536900  | 2.46649400  | 0.00636200  |
| C | 0.00000000 | -4.31180600 | 0.41659100  | H | -4.32581300 | 3.20571500  | -0.00513900 |
| C | 0.00000000 | -4.30493800 | 1.77233800  | H | 2.16102200  | 3.23812600  | -0.01828500 |
| C | 0.00000000 | -2.90970800 | -0.00370600 | H | 2.02403900  | -3.23356300 | -0.00385400 |
| C | 0.00000000 | -2.89441500 | 2.16991900  | H | -4.36501100 | -3.17372500 | -0.00515600 |
| C | 0.00000000 | -1.13498200 | 3.95340400  | N | 1.04857700  | 0.01477000  | 0.00853500  |
| C | 0.00000000 | -2.44765700 | 3.51292800  | N | -1.15629100 | -2.04930100 | -0.01272600 |
| C | 0.00000000 | -2.50187400 | -1.32869400 | N | -3.20897000 | 0.00201900  | 0.00224100  |
| C | 0.00000000 | 2.44765700  | 3.51292800  | H | -6.25676700 | 1.41621300  | 0.00618500  |
| C | 0.00000000 | 2.90970800  | -0.00370600 | H | -6.30473700 | -1.28247800 | -0.00137200 |
| C | 0.00000000 | 2.50187400  | -1.32869400 | H | -2.49292000 | -5.06364200 | 0.00474800  |
| H | 0.00000000 | -3.30255600 | -2.06381900 | H | 0.19242400  | -5.05495600 | 0.00593300  |
| H | 0.00000000 | 3.30255600  | -2.06381900 | C | -1.08040500 | 2.06249500  | 0.05365900  |
| H | 0.00000000 | 3.20818000  | 4.28765400  | H | -1.07929400 | 0.99498400  | 0.11555500  |
| H | 0.00000000 | -3.20818000 | 4.28765400  | H | -1.19175100 | -1.03622100 | -0.03397000 |
| N | 0.00000000 | 2.08169500  | 1.09873200  | C | 4.29700000  | -1.61159000 | -0.00845900 |
| N | 0.00000000 | 0.00000000  | 3.17272800  | C | 5.67125200  | -1.31063800 | -0.00883300 |
| N | 0.00000000 | -2.08169500 | 1.09873200  | C | 6.28102800  | -0.06054100 | -0.00213600 |
| H | 0.00000000 | -5.16589100 | -0.24919700 | C | 5.70319100  | 1.21848400  | 0.00617700  |
| H | 0.00000000 | -5.15074100 | 2.44834600  | C | 4.35141300  | 1.56182000  | 0.01010600  |
| H | 0.00000000 | -1.34356500 | 6.18077300  | H | 4.05714500  | -2.67234400 | -0.01460400 |
| H | 0.00000000 | 1.34356500  | 6.18077300  | H | 6.34060800  | -2.16655700 | -0.01474400 |
| H | 0.00000000 | 5.15074100  | 2.44834600  | H | 7.36907800  | -0.07452100 | -0.00364700 |
| H | 0.00000000 | 5.16589100  | -0.24919700 | H | 6.40202800  | 2.05046200  | 0.01014700  |
| C | 0.00000000 | 0.00000000  | -1.01371700 | H | 4.14552700  | 2.62939000  | 0.01796900  |
| H | 0.00000000 | 0.00000000  | 0.05887300  | H | 0.25994000  | 5.15471400  | -0.07401000 |
| H | 0.00000000 | 0.00000000  | 2.15844800  | H | -2.39769900 | 5.13859200  | -0.07876400 |

**APs-c**

|   |             |             |             |
|---|-------------|-------------|-------------|
| C | -0.00109100 | -0.42592200 | 4.31244100  |
| C | 0.00355300  | -1.78435600 | 4.29943900  |
| C | -0.00199600 | -0.01559400 | 2.91050700  |
| C | -0.00814500 | 3.14656800  | -0.73279300 |
| C | -0.00814500 | 3.14656800  | 0.73279300  |
| C | -0.01398700 | 1.77626300  | 1.15059100  |
| C | 0.00355300  | -1.78435600 | -4.29943900 |
| C | -0.00109100 | -0.42592200 | -4.31244100 |
| C | 0.00910200  | -2.18550100 | -2.89352700 |
| C | -0.00199600 | -0.01559400 | -2.91050700 |
| C | -0.04189700 | -5.38681900 | -0.67698300 |
| C | -0.04189700 | -5.38681900 | 0.67698300  |
| C | 0.02419900  | -3.98096800 | -1.14455300 |
| C | 0.02419900  | -3.98096800 | 1.14455300  |
| C | 0.00910200  | -2.18550100 | 2.89352700  |
| C | 0.01020100  | -3.53030500 | 2.46482700  |
| C | 0.01020100  | -3.53030500 | -2.46482700 |
| C | -0.01069100 | 1.31210500  | 2.47006000  |
| C | -0.01398700 | 1.77626300  | -1.15059100 |
| C | -0.01069100 | 1.31210500  | -2.47006000 |
| H | -0.01431700 | -4.27726900 | -3.25648700 |
| H | -0.01322900 | 2.07137700  | -3.24459700 |
| H | -0.01322900 | 2.07137700  | 3.24459700  |
| H | -0.01431700 | -4.27726900 | 3.25648700  |
| N | -0.01862000 | 1.00583400  | 0.00000000  |
| N | 0.00424400  | -1.09354100 | 2.08262600  |
| H | -0.09208100 | -6.25082100 | -1.32915000 |
| H | -0.09208100 | -6.25082100 | 1.32915000  |
| H | 0.00554800  | -2.46121200 | 5.14476100  |
| H | -0.00654700 | 0.23811800  | 5.16769800  |
| C | -0.00147700 | 4.25438700  | 1.58289400  |
| C | 0.00491900  | 5.61254700  | 1.26174900  |
| C | 0.00767300  | 6.21533100  | 0.00000000  |
| C | 0.00491900  | 5.61254700  | -1.26174900 |
| C | -0.00147700 | 4.25438700  | -1.58289400 |

**APs-ab**

|   |             |             |             |
|---|-------------|-------------|-------------|
| C | 0.01361700  | -3.53331300 | 3.92324600  |
| C | 0.00810500  | -2.52730400 | 4.82842200  |
| C | 0.02814600  | -2.88856000 | 2.60134300  |
| C | -0.14478800 | -2.53695800 | -2.20039500 |
| C | -0.13680400 | -3.58285800 | -1.17288800 |
| C | 0.00000000  | -2.93588700 | 0.10693300  |
| C | 0.13680400  | 3.58285800  | -1.17288800 |
| C | 0.14478800  | 2.53695800  | -2.20039500 |
| C | 0.00000000  | 2.93588700  | 0.10693300  |
| C | 0.01360500  | 1.25936000  | -1.52186700 |
| C | -0.01361700 | 3.53331300  | 3.92324600  |
| C | -0.00810500 | 2.52730400  | 4.82842200  |
| C | -0.02814600 | 2.88856000  | 2.60134300  |
| C | -0.01673700 | 1.27002700  | 4.05495800  |
| C | 0.01673700  | -1.27002700 | 4.05495800  |
| C | 0.00000000  | 0.00000000  | 4.65798100  |
| C | -0.01262100 | 3.56284200  | 1.38336200  |
| C | 0.01262100  | -3.56284200 | 1.38336200  |
| C | -0.01360500 | -1.25936000 | -1.52186700 |
| C | 0.00000000  | 0.00000000  | -2.15607100 |
| H | 0.01075900  | 4.64796700  | 1.42943500  |
| H | 0.00000000  | 0.00000000  | -3.24163500 |
| H | -0.01075900 | -4.64796700 | 1.42943500  |
| H | 0.00000000  | 0.00000000  | 5.74567900  |
| N | 0.03524800  | -1.52800400 | 2.73110500  |
| N | -0.03524800 | 1.52800400  | 2.73110500  |
| H | -0.00759100 | -2.59998500 | 5.90922800  |
| H | 0.00641800  | -4.60092100 | 4.10663500  |
| C | -0.26583000 | -2.70662900 | -3.57499400 |
| C | -0.38204900 | -3.88930500 | -4.31794200 |
| C | -0.42587600 | -5.20704000 | -3.86742300 |
| C | -0.36800000 | -5.68289000 | -2.55267100 |
| C | -0.24682800 | -4.96195000 | -1.36462900 |
| H | -0.26998800 | -1.79474900 | -4.16612100 |
| H | -0.45089000 | -3.75739700 | -5.39506800 |



|   |             |             |             |   |             |             |             |
|---|-------------|-------------|-------------|---|-------------|-------------|-------------|
| H | -0.00131800 | 4.03392200  | 2.64676500  | H | -0.52201400 | -5.96697200 | -4.63943400 |
| H | 0.00861100  | 6.29261100  | 2.10935200  | H | -0.42832100 | -6.76271500 | -2.44078700 |
| H | 0.01313800  | 7.30275800  | 0.00000000  | H | -0.23376500 | -5.56174300 | -0.45851600 |
| H | 0.00861100  | 6.29261100  | -2.10935200 | H | -0.00641800 | 4.60092100  | 4.10663500  |
| H | -0.00131800 | 4.03392200  | -2.64676500 | H | 0.00759100  | 2.59998500  | 5.90922800  |
| H | -0.00654700 | 0.23811800  | -5.16769800 | C | 0.26583000  | 2.70662900  | -3.57499400 |
| H | 0.00554800  | -2.46121200 | -5.14476100 | C | 0.38204900  | 3.88930500  | -4.31794200 |
| C | 0.07610400  | -3.16914100 | 0.00000000  | C | 0.42587600  | 5.20704000  | -3.86742300 |
| N | 0.00424400  | -1.09354100 | -2.08262600 | C | 0.36800000  | 5.68289000  | -2.55267100 |
| H | 0.15159800  | -2.10229100 | 0.00000000  | C | 0.24682800  | 4.96195000  | -1.36462900 |
| H | -0.04209900 | -0.01117700 | 0.00000000  | H | 0.23376500  | 5.56174300  | -0.45851600 |

|   |             |             |             |   |             |             |             |
|---|-------------|-------------|-------------|---|-------------|-------------|-------------|
| H | 0.42832100  | 6.76271500  | -2.44078700 | H | 0.52201400  | 5.96697200  | -4.63943400 |
| H | 0.52201400  | 5.96697200  | -4.63943400 | H | 0.45089000  | 3.75739700  | -5.39506800 |
| H | 0.45089000  | 3.75739700  | -5.39506800 | H | 0.26998800  | 1.79474900  | -4.16612100 |
| H | 0.26998800  | 1.79474900  | -4.16612100 | C | -0.09659400 | 1.55304600  | -0.14097500 |
| C | -0.09659400 | 1.55304600  | -0.14097500 | C | 0.09659400  | -1.55304600 | -0.14097500 |
| C | 0.09659400  | -1.55304600 | -0.14097500 | H | 0.25019900  | -0.86472400 | 0.67225700  |
| H | 0.25019900  | -0.86472400 | 0.67225700  | H | -0.25019900 | 0.86472400  | 0.67225700  |

### Mg-APs-a

|   |            |             |             |
|---|------------|-------------|-------------|
| C | 0.00000000 | 0.68003100  | 5.30861200  |
| C | 0.00000000 | -0.68003100 | 5.30861200  |
| C | 0.00000000 | 1.10902700  | 3.91825400  |
| C | 0.00000000 | 4.28617900  | 0.36688400  |
| C | 0.00000000 | 4.28375800  | 1.73032500  |
| C | 0.00000000 | 2.89349100  | 2.14654100  |
| C | 0.00000000 | 0.00000000  | -6.33909200 |
| C | 0.00000000 | -1.25825400 | -5.73306200 |
| C | 0.00000000 | -1.58024400 | -4.37233700 |
| C | 0.00000000 | 1.25825400  | -5.73306200 |
| C | 0.00000000 | -0.73508800 | -3.26375600 |
| C | 0.00000000 | 1.58024400  | -4.37233700 |
| C | 0.00000000 | 0.73508800  | -3.26375600 |
| H | 0.00000000 | 0.00000000  | -7.42655000 |
| H | 0.00000000 | -2.10692900 | -6.41319200 |
| H | 0.00000000 | -2.64513100 | -4.15190300 |
| H | 0.00000000 | 2.10692900  | -6.41319200 |
| H | 0.00000000 | 2.64513100  | -4.15190300 |
| C | 0.00000000 | -1.14709700 | -1.87747100 |
| C | 0.00000000 | 1.14709700  | -1.87747100 |
| C | 0.00000000 | -4.28617900 | 0.36688400  |
| C | 0.00000000 | -4.28375800 | 1.73032500  |
| C | 0.00000000 | -2.90161300 | -0.06745400 |
| C | 0.00000000 | -2.89349100 | 2.14654100  |
| C | 0.00000000 | -1.10902700 | 3.91825400  |
| C | 0.00000000 | -2.43414500 | 3.48185900  |
| C | 0.00000000 | -2.48559200 | -1.39816500 |
| C | 0.00000000 | 2.43414500  | 3.48185900  |
| C | 0.00000000 | 2.90161300  | -0.06745400 |
| C | 0.00000000 | 2.48559200  | -1.39816500 |
| H | 0.00000000 | -3.29630900 | -2.12379100 |
| H | 0.00000000 | 3.29630900  | -2.12379100 |
| H | 0.00000000 | 3.19751200  | 4.25426700  |
| H | 0.00000000 | -3.19751200 | 4.25426700  |
| N | 0.00000000 | 2.08542600  | 1.05212500  |
| N | 0.00000000 | 0.00000000  | 3.10686200  |
| N | 0.00000000 | -2.08542600 | 1.05212500  |
| H | 0.00000000 | -5.14375800 | -0.29412400 |
| H | 0.00000000 | -5.13600500 | 2.39754300  |
| H | 0.00000000 | -1.34542900 | 6.16232200  |
| H | 0.00000000 | 1.34542900  | 6.16232200  |
| H | 0.00000000 | 5.13600500  | 2.39754300  |
| H | 0.00000000 | 5.14375800  | -0.29412400 |

### Zn-APs-a

|   |            |             |             |
|---|------------|-------------|-------------|
| C | 0.00000000 | 0.67857000  | 5.15713100  |
| C | 0.00000000 | -0.67857000 | 5.15713100  |
| C | 0.00000000 | 1.10690900  | 3.76933600  |
| C | 0.00000000 | 4.31701600  | 0.28067100  |
| C | 0.00000000 | 4.31460100  | 1.64251600  |
| C | 0.00000000 | 2.92061600  | 2.05281700  |
| C | 0.00000000 | 0.00000000  | -6.36645800 |
| C | 0.00000000 | -1.25796100 | -5.76079000 |
| C | 0.00000000 | -1.57842300 | -4.39951800 |
| C | 0.00000000 | 1.25796100  | -5.76079000 |
| C | 0.00000000 | -0.73340900 | -3.29169400 |
| C | 0.00000000 | 1.57842300  | -4.39951800 |
| C | 0.00000000 | 0.73340900  | -3.29169400 |
| H | 0.00000000 | 0.00000000  | -7.45402200 |
| H | 0.00000000 | -2.10708700 | -6.44011500 |
| H | 0.00000000 | -2.64333000 | -4.18091600 |
| H | 0.00000000 | 2.10708700  | -6.44011500 |
| H | 0.00000000 | 2.64333000  | -4.18091600 |
| C | 0.00000000 | -1.14681100 | -1.90722100 |
| C | 0.00000000 | 1.14681100  | -1.90722100 |
| C | 0.00000000 | -4.31701600 | 0.28067100  |
| C | 0.00000000 | -4.31460100 | 1.64251600  |
| C | 0.00000000 | -2.92882500 | -0.14734400 |
| C | 0.00000000 | -2.92061600 | 2.05281700  |
| C | 0.00000000 | -1.10690900 | 3.76933600  |
| C | 0.00000000 | -2.44042300 | 3.37391100  |
| C | 0.00000000 | -2.49430400 | -1.46546800 |
| C | 0.00000000 | 2.44042300  | 3.37391100  |
| C | 0.00000000 | 2.92882500  | -0.14734400 |
| C | 0.00000000 | 2.49430400  | -1.46546800 |
| H | 0.00000000 | -3.28537400 | -2.21098900 |
| H | 0.00000000 | 3.28537400  | -2.21098900 |
| H | 0.00000000 | 3.18071800  | 4.16826700  |
| H | 0.00000000 | -3.18071800 | 4.16826700  |
| N | 0.00000000 | 2.11210100  | 0.96552500  |
| N | 0.00000000 | 0.00000000  | 2.94483800  |
| N | 0.00000000 | -2.11210100 | 0.96552500  |
| H | 0.00000000 | -5.17280400 | -0.38269200 |
| H | 0.00000000 | -5.16510700 | 2.31220700  |
| H | 0.00000000 | -1.34842000 | 6.00696900  |
| H | 0.00000000 | 1.34842000  | 6.00696900  |
| H | 0.00000000 | 5.16510700  | 2.31220700  |
| H | 0.00000000 | 5.17280400  | -0.38269200 |

|    |            |            |             |    |            |            |             |
|----|------------|------------|-------------|----|------------|------------|-------------|
| C  | 0.00000000 | 0.00000000 | -1.04197500 | C  | 0.00000000 | 0.00000000 | -1.06671800 |
| Mg | 0.00000000 | 0.00000000 | 1.05751500  | Zn | 0.00000000 | 0.00000000 | 0.92413900  |

**Mg-APs-b**

|    |             |             |            |
|----|-------------|-------------|------------|
| C  | -4.25616000 | 0.43441100  | 0.00000000 |
| C  | -4.23330500 | 1.79458800  | 0.00000000 |
| C  | -2.87319200 | -0.01580500 | 0.00000000 |
| C  | 0.70146000  | -3.25349500 | 0.00000000 |
| C  | -0.76735400 | -3.24841300 | 0.00000000 |
| C  | -1.14550800 | -1.84739100 | 0.00000000 |
| C  | 4.33922600  | 1.66160100  | 0.00000000 |
| C  | 4.33604800  | 0.30710800  | 0.00000000 |
| C  | 2.92725600  | 2.13246500  | 0.00000000 |
| C  | 2.92216600  | -0.13894900 | 0.00000000 |
| C  | 0.75966100  | 5.32071600  | 0.00000000 |
| C  | -0.60921900 | 5.34935300  | 0.00000000 |
| C  | 1.15935400  | 3.93194200  | 0.00000000 |
| C  | -1.04949400 | 3.97288900  | 0.00000000 |
| C  | -2.83920400 | 2.20296500  | 0.00000000 |
| C  | -2.38874900 | 3.52172500  | 0.00000000 |
| C  | 2.48963200  | 3.46897200  | 0.00000000 |
| C  | -2.46604900 | -1.35093500 | 0.00000000 |
| C  | 1.10197400  | -1.88850100 | 0.00000000 |
| C  | 2.46431700  | -1.44187500 | 0.00000000 |
| H  | 3.24614500  | 4.25313900  | 0.00000000 |
| H  | 3.21088500  | -2.23293500 | 0.00000000 |
| H  | -3.26728000 | -2.08214100 | 0.00000000 |
| H  | -3.15588000 | 4.29084100  | 0.00000000 |
| N  | -0.01825000 | -1.07611300 | 0.00000000 |
| N  | -2.04341500 | 1.07662800  | 0.00000000 |
| N  | 0.03181300  | 3.14301200  | 0.00000000 |
| H  | 1.43897900  | 6.16380400  | 0.00000000 |
| H  | -1.25685700 | 6.21651600  | 0.00000000 |
| H  | -5.07674100 | 2.47311800  | 0.00000000 |
| H  | -5.12115300 | -0.21636600 | 0.00000000 |
| C  | 2.06825100  | 1.01579500  | 0.00000000 |
| C  | -1.62954200 | -4.32542100 | 0.00000000 |
| C  | -1.32556300 | -5.70426400 | 0.00000000 |
| C  | -0.08084600 | -6.31043600 | 0.00000000 |
| C  | 1.20243800  | -5.72283800 | 0.00000000 |
| C  | 1.54096400  | -4.37823000 | 0.00000000 |
| H  | -2.69078300 | -4.08932200 | 0.00000000 |
| H  | -2.18280200 | -6.37211400 | 0.00000000 |
| H  | -0.08940400 | -7.39838400 | 0.00000000 |
| H  | 2.03577000  | -6.42010000 | 0.00000000 |
| H  | 2.60802100  | -4.17188600 | 0.00000000 |
| H  | 5.20377700  | -0.34376800 | 0.00000000 |
| H  | 5.21491000  | 2.30281600  | 0.00000000 |
| Mg | 0.00000000  | 1.05785300  | 0.00000000 |

**Zn-APs-b**

|    |             |             |            |
|----|-------------|-------------|------------|
| C  | -4.19359900 | 0.20531300  | 0.00000000 |
| C  | -4.21802000 | 1.56145700  | 0.00000000 |
| C  | -2.79859000 | -0.19851400 | 0.00000000 |
| C  | 0.80869800  | -3.36015700 | 0.00000000 |
| C  | -0.66027900 | -3.40184800 | 0.00000000 |
| C  | -1.07371100 | -2.01483400 | 0.00000000 |
| C  | 4.19904100  | 1.71983700  | 0.00000000 |
| C  | 4.24075500  | 0.36853700  | 0.00000000 |
| C  | 2.77660500  | 2.14439600  | 0.00000000 |
| C  | 2.84685300  | -0.12555400 | 0.00000000 |
| C  | 0.57202800  | 5.30767300  | 0.00000000 |
| C  | -0.79445400 | 5.28856700  | 0.00000000 |
| C  | 1.01670800  | 3.92826000  | 0.00000000 |
| C  | -1.18232400 | 3.89237400  | 0.00000000 |
| C  | -2.84100400 | 2.01978300  | 0.00000000 |
| C  | -2.48548600 | 3.36636000  | 0.00000000 |
| C  | 2.34355300  | 3.48279900  | 0.00000000 |
| C  | -2.39584600 | -1.52822800 | 0.00000000 |
| C  | 1.15665500  | -1.97718800 | 0.00000000 |
| C  | 2.48464400  | -1.45576800 | 0.00000000 |
| H  | 3.10402700  | 4.26208600  | 0.00000000 |
| H  | 3.28566000  | -2.19133700 | 0.00000000 |
| H  | -3.19870600 | -2.25788900 | 0.00000000 |
| H  | -3.30647000 | 4.07721300  | 0.00000000 |
| N  | 0.01883000  | -1.20888000 | 0.00000000 |
| N  | -1.99373900 | 0.92610300  | 0.00000000 |
| N  | -0.07859000 | 3.10328700  | 0.00000000 |
| H  | 1.22300100  | 6.17290600  | 0.00000000 |
| H  | -1.47336900 | 6.13146000  | 0.00000000 |
| H  | -5.08088500 | 2.21480900  | 0.00000000 |
| H  | -5.03147900 | -0.47977200 | 0.00000000 |
| C  | 1.95012800  | 1.00223000  | 0.00000000 |
| C  | -1.48794900 | -4.50696500 | 0.00000000 |
| C  | -1.13605100 | -5.87164500 | 0.00000000 |
| C  | 0.13289300  | -6.43403600 | 0.00000000 |
| C  | 1.39327700  | -5.80729700 | 0.00000000 |
| C  | 1.68693600  | -4.44817900 | 0.00000000 |
| H  | -2.55656000 | -4.30473800 | 0.00000000 |
| H  | -1.96771100 | -6.57096500 | 0.00000000 |
| H  | 0.16016000  | -7.52176900 | 0.00000000 |
| H  | 2.24948100  | -6.47622100 | 0.00000000 |
| H  | 2.74604900  | -4.20251400 | 0.00000000 |
| H  | 5.12479400  | -0.25942700 | 0.00000000 |
| H  | 5.04772700  | 2.39584200  | 0.00000000 |
| Zn | 0.00000000  | 1.01075000  | 0.00000000 |

**Mg-APs-c**

|   |            |             |             |
|---|------------|-------------|-------------|
| C | 0.00000000 | 0.73215400  | -3.22562600 |
| C | 0.00000000 | -0.73215400 | -3.22562600 |
| C | 0.00000000 | 1.12592900  | -1.84156300 |
| C | 0.00000000 | 4.27437100  | 1.73605400  |
| C | 0.00000000 | 4.29292100  | 0.37041600  |
| C | 0.00000000 | 2.90952000  | -0.06032100 |
| C | 0.00000000 | -1.13283400 | 3.95863100  |
| C | 0.00000000 | 1.13283400  | 3.95863100  |
| C | 0.00000000 | -4.27437100 | 1.73605400  |
| C | 0.00000000 | -4.29292100 | 0.37041600  |
| C | 0.00000000 | -2.88577900 | 2.15048200  |
| C | 0.00000000 | -2.90952000 | -0.06032100 |
| C | 0.00000000 | -1.12592900 | -1.84156300 |

**Zn-APs-c**

|   |            |             |             |
|---|------------|-------------|-------------|
| C | 0.00000000 | 0.72973400  | -3.26485100 |
| C | 0.00000000 | -0.72973400 | -3.26485100 |
| C | 0.00000000 | 1.12350700  | -1.88214300 |
| C | 0.00000000 | 4.30717200  | 1.63450200  |
| C | 0.00000000 | 4.32466300  | 0.27087100  |
| C | 0.00000000 | 2.93686600  | -0.15238500 |
| C | 0.00000000 | -1.13265300 | 3.79909500  |
| C | 0.00000000 | 1.13265300  | 3.79909500  |
| C | 0.00000000 | -4.30717200 | 1.63450200  |
| C | 0.00000000 | -4.32466300 | 0.27087100  |
| C | 0.00000000 | -2.91424900 | 2.04463100  |
| C | 0.00000000 | -2.93686600 | -0.15238500 |
| C | 0.00000000 | -1.12350700 | -1.88214300 |

|    |            |             |             |    |            |             |             |
|----|------------|-------------|-------------|----|------------|-------------|-------------|
| C  | 0.00000000 | -2.45924200 | -1.38288100 | C  | 0.00000000 | -2.46591900 | -1.45962400 |
| C  | 0.00000000 | -2.45197200 | 3.50090500  | C  | 0.00000000 | -2.46175700 | 3.38189100  |
| C  | 0.00000000 | 2.45924200  | -1.38288100 | C  | 0.00000000 | 2.46591900  | -1.45962400 |
| C  | 0.00000000 | 2.88577900  | 2.15048200  | C  | 0.00000000 | 2.91424900  | 2.04463100  |
| C  | 0.00000000 | 2.45197200  | 3.50090500  | C  | 0.00000000 | 2.46175700  | 3.38189100  |
| H  | 0.00000000 | -3.25562000 | 4.23634900  | H  | 0.00000000 | -3.24224900 | 4.14086300  |
| H  | 0.00000000 | 3.25562000  | 4.23634900  | H  | 0.00000000 | 3.24224900  | 4.14086300  |
| H  | 0.00000000 | 3.23616600  | -2.13990800 | H  | 0.00000000 | 3.22339900  | -2.23537100 |
| H  | 0.00000000 | -3.23616600 | -2.13990800 | H  | 0.00000000 | -3.22339900 | -2.23537100 |
| N  | 0.00000000 | 2.08683100  | 1.03827700  | N  | 0.00000000 | 2.11488800  | 0.94052700  |
| N  | 0.00000000 | 0.00000000  | -1.04425700 | N  | 0.00000000 | 0.00000000  | -1.07146500 |
| N  | 0.00000000 | -2.08683100 | 1.03827700  | N  | 0.00000000 | -2.11488800 | 0.94052700  |
| H  | 0.00000000 | -5.12218600 | 2.40951200  | H  | 0.00000000 | -5.15364700 | 2.30960200  |
| H  | 0.00000000 | -5.15478800 | -0.28442600 | H  | 0.00000000 | -5.18437100 | -0.38685100 |
| H  | 0.00000000 | 5.15478800  | -0.28442600 | H  | 0.00000000 | 5.18437100  | -0.38685100 |
| H  | 0.00000000 | 5.12218600  | 2.40951200  | H  | 0.00000000 | 5.15364700  | 2.30960200  |
| C  | 0.00000000 | 0.00000000  | 3.10667700  | C  | 0.00000000 | 0.00000000  | 2.94152000  |
| Mg | 0.00000000 | 0.00000000  | 1.03718000  | C  | 0.00000000 | 1.58071400  | -4.36836400 |
| C  | 0.00000000 | 1.58333100  | -4.32858600 | C  | 0.00000000 | 1.26130500  | -5.72883700 |
| C  | 0.00000000 | 1.26239200  | -5.68886300 | C  | 0.00000000 | 0.00000000  | -6.33030700 |
| C  | 0.00000000 | 0.00000000  | -6.28902500 | C  | 0.00000000 | -1.26130500 | -5.72883700 |
| C  | 0.00000000 | -1.26239200 | -5.68886300 | C  | 0.00000000 | -1.58071400 | -4.36836400 |
| C  | 0.00000000 | -1.58333100 | -4.32858600 | H  | 0.00000000 | 2.64492200  | -4.14988200 |
| H  | 0.00000000 | 2.64746600  | -4.10757500 | H  | 0.00000000 | 2.10901600  | -6.40883300 |
| H  | 0.00000000 | 2.10897600  | -6.37025100 | H  | 0.00000000 | 0.00000000  | -7.41796400 |
| H  | 0.00000000 | 0.00000000  | -7.37671800 | H  | 0.00000000 | -2.10901600 | -6.40883300 |
| H  | 0.00000000 | -2.10897600 | -6.37025100 | H  | 0.00000000 | -2.64492200 | -4.14988200 |
| H  | 0.00000000 | -2.64746600 | -4.10757500 | C  | 0.00000000 | 0.67534500  | 5.21327800  |
| C  | 0.00000000 | 0.67601100  | 5.37910000  | C  | 0.00000000 | -0.67534500 | 5.21327800  |
| C  | 0.00000000 | -0.67601100 | 5.37910000  | H  | 0.00000000 | 1.32850300  | 6.07915100  |
| H  | 0.00000000 | 1.32423200  | 6.24908300  | H  | 0.00000000 | -1.32850300 | 6.07915100  |
| H  | 0.00000000 | -1.32423200 | 6.24908300  | Zn | 0.00000000 | 0.00000000  | 0.98431400  |

#### Mg-APs-ab

|   |            |             |             |
|---|------------|-------------|-------------|
| C | 0.00000000 | 3.50887200  | 3.83186700  |
| C | 0.00000000 | 2.54500500  | 4.79029300  |
| C | 0.00000000 | 2.83923500  | 2.53693200  |
| C | 0.00000000 | 2.54695600  | -2.30535400 |
| C | 0.00000000 | 3.58021000  | -1.25857200 |
| C | 0.00000000 | 2.89422100  | 0.01077600  |
| C | 0.00000000 | -3.58021000 | -1.25857200 |
| C | 0.00000000 | -2.54695600 | -2.30535400 |
| C | 0.00000000 | -2.89422100 | 0.01077600  |
| C | 0.00000000 | -1.26631200 | -1.61518700 |
| C | 0.00000000 | -3.50887200 | 3.83186700  |
| C | 0.00000000 | -2.54500500 | 4.79029300  |
| C | 0.00000000 | -2.83923500 | 2.53693200  |
| C | 0.00000000 | -1.25927000 | 4.10131600  |
| C | 0.00000000 | 1.25927000  | 4.10131600  |
| C | 0.00000000 | 0.00000000  | 4.72702300  |
| C | 0.00000000 | -3.49529400 | 1.31164500  |
| C | 0.00000000 | 3.49529400  | 1.31164500  |
| C | 0.00000000 | 1.26631200  | -1.61518700 |
| C | 0.00000000 | 0.00000000  | -2.24507200 |
| H | 0.00000000 | -4.58103500 | 1.38027300  |
| H | 0.00000000 | 0.00000000  | -3.33443000 |
| H | 0.00000000 | 4.58103500  | 1.38027300  |
| H | 0.00000000 | 0.00000000  | 5.81283800  |
| N | 0.00000000 | 1.46879900  | 2.75489500  |
| N | 0.00000000 | -1.46879900 | 2.75489500  |
| H | 0.00000000 | 2.67489900  | 5.86505000  |
| H | 0.00000000 | 4.58271300  | 3.97237700  |
| C | 0.00000000 | 2.74026700  | -3.68098800 |
| C | 0.00000000 | 3.93803800  | -4.41370500 |

#### Zn-APs-ab

|   |             |             |             |
|---|-------------|-------------|-------------|
| C | 0.13288200  | 3.48784200  | 3.72346600  |
| C | 0.12783600  | 2.52514300  | 4.67929800  |
| C | 0.08656400  | 2.81273900  | 2.43371600  |
| C | -0.09177400 | 2.52608300  | -2.37155100 |
| C | -0.07514500 | 3.54831600  | -1.32451700 |
| C | -0.10277800 | 2.85627100  | -0.06055300 |
| C | 0.07514500  | -3.54831600 | -1.32451700 |
| C | 0.09177400  | -2.52608300 | -2.37155100 |
| C | 0.10277800  | -2.85627100 | -0.06055300 |
| C | 0.12523000  | -1.24526200 | -1.68551400 |
| C | -0.13288200 | -3.48784200 | 3.72346600  |
| C | -0.12783600 | -2.52514300 | 4.67929800  |
| C | -0.08656400 | -2.81273900 | 2.43371600  |
| C | -0.08547900 | -1.24349900 | 3.98630300  |
| C | 0.08547900  | 1.24349900  | 3.98630300  |
| C | 0.00000000  | 0.00000000  | 4.62080100  |
| C | 0.00000000  | -3.47004000 | 1.21973400  |
| C | 0.00000000  | 3.47004000  | 1.21973400  |
| C | -0.12523000 | 1.24526200  | -1.68551400 |
| C | 0.00000000  | 0.00000000  | -2.32649300 |
| H | -0.03597500 | -4.55482800 | 1.27876400  |
| H | 0.00000000  | 0.00000000  | -3.41447100 |
| H | 0.03597500  | 4.55482800  | 1.27876400  |
| H | 0.00000000  | 0.00000000  | 5.70625800  |
| N | 0.09184500  | 1.44213800  | 2.63803300  |
| N | -0.09184500 | -1.44213800 | 2.63803300  |
| H | 0.14037400  | 2.64832300  | 5.75471400  |
| H | 0.14682200  | 4.56225500  | 3.85752400  |
| C | -0.08440800 | 2.72085900  | -3.74653600 |
| C | -0.11178000 | 3.92206400  | -4.47436300 |

|    |            |             |             |    |             |             |             |
|----|------------|-------------|-------------|----|-------------|-------------|-------------|
| C  | 0.00000000 | 5.24928100  | -3.95006200 | C  | -0.11402800 | 5.23037400  | -4.00499600 |
| C  | 0.00000000 | 5.70577300  | -2.62424300 | C  | -0.08794400 | 5.68137000  | -2.67605200 |
| C  | 0.00000000 | 4.96771000  | -1.44307300 | C  | -0.06352600 | 4.93825600  | -1.49970500 |
| H  | 0.00000000 | 1.83693200  | -4.28642400 | H  | -0.07111300 | 1.82015500  | -4.35518400 |
| H  | 0.00000000 | 3.82106500  | -5.49511600 | H  | -0.13050500 | 3.80930400  | -5.55602500 |
| H  | 0.00000000 | 6.02256400  | -4.71474500 | H  | -0.13239100 | 6.00729100  | -4.76572700 |
| H  | 0.00000000 | 6.78642000  | -2.50129800 | H  | -0.08096300 | 6.76140400  | -2.54852200 |
| H  | 0.00000000 | 5.55871900  | -0.53016500 | H  | -0.03548200 | 5.52492800  | -0.58485800 |
| H  | 0.00000000 | -4.58271300 | 3.97237700  | H  | -0.14682200 | -4.56225500 | 3.85752400  |
| H  | 0.00000000 | -2.67489900 | 5.86505000  | H  | -0.14037400 | -2.64832300 | 5.75471400  |
| C  | 0.00000000 | -2.74026700 | -3.68098800 | C  | 0.08440800  | -2.72085900 | -3.74653600 |
| C  | 0.00000000 | -3.93803800 | -4.41370500 | C  | 0.11178000  | -3.92206400 | -4.47436300 |
| C  | 0.00000000 | -5.24928100 | -3.95006200 | C  | 0.11402800  | -5.23037400 | -4.00499600 |
| C  | 0.00000000 | -5.70577300 | -2.62424300 | C  | 0.08794400  | -5.68137000 | -2.67605200 |
| C  | 0.00000000 | -4.96771000 | -1.44307300 | C  | 0.06352600  | -4.93825600 | -1.49970500 |
| H  | 0.00000000 | -5.55871900 | -0.53016500 | H  | 0.03548200  | -5.52492800 | -0.58485800 |
| H  | 0.00000000 | -6.78642000 | -2.50129800 | H  | 0.08096300  | -6.76140400 | -2.54852200 |
| H  | 0.00000000 | -6.02256400 | -4.71474500 | H  | 0.13239100  | -6.00729100 | -4.76572700 |
| H  | 0.00000000 | -3.82106500 | -5.49511600 | H  | 0.13050500  | -3.80930400 | -5.55602500 |
| H  | 0.00000000 | -1.83693200 | -4.28642400 | H  | 0.07111300  | -1.82015500 | -4.35518400 |
| Mg | 0.00000000 | 0.00000000  | 1.30139500  | C  | -0.23812400 | 1.46128400  | -0.27543000 |
| C  | 0.00000000 | 1.49573800  | -0.20291800 | C  | 0.23812400  | -1.46128400 | -0.27543000 |
| C  | 0.00000000 | -1.49573800 | -0.20291800 | Zn | 0.00000000  | 0.00000000  | 1.12563000  |

|   |            | P           |             |   | A          |             |             |
|---|------------|-------------|-------------|---|------------|-------------|-------------|
| C | 0.00000000 | 4.25627100  | 0.67803300  | C | 0.00000000 | 0.00000000  | -2.50330100 |
| C | 0.00000000 | 4.25627100  | -0.67803300 | C | 0.00000000 | 1.26606900  | -1.91074000 |
| C | 0.00000000 | 2.85383200  | 1.08464300  | C | 0.00000000 | 1.59455300  | -0.55209300 |
| C | 0.00000000 | -0.68600900 | 4.26081400  | C | 0.00000000 | -1.26606900 | -1.91074000 |
| C | 0.00000000 | 0.68600900  | 4.26081400  | C | 0.00000000 | 0.75015800  | 0.55448600  |
| C | 0.00000000 | 1.12956000  | 2.89636700  | C | 0.00000000 | -1.59455300 | -0.55209300 |
| C | 0.00000000 | -4.25627100 | -0.67803300 | C | 0.00000000 | -0.75015800 | 0.55448600  |
| C | 0.00000000 | -4.25627100 | 0.67803300  | H | 0.00000000 | 0.00000000  | -3.59182800 |
| C | 0.00000000 | -2.85383200 | -1.08464300 | H | 0.00000000 | 2.10778000  | -2.59892400 |
| C | 0.00000000 | -2.85383200 | 1.08464300  | H | 0.00000000 | 2.65988600  | -0.32354100 |
| C | 0.00000000 | -0.68600900 | -4.26081400 | H | 0.00000000 | -2.10778000 | -2.59892400 |
| C | 0.00000000 | 0.68600900  | -4.26081400 | H | 0.00000000 | -2.65988600 | -0.32354100 |
| C | 0.00000000 | -1.12956000 | -2.89636700 | C | 0.00000000 | 1.14991500  | 1.90181000  |
| C | 0.00000000 | 1.12956000  | -2.89636700 | H | 0.00000000 | 2.17598300  | 2.24794000  |
| C | 0.00000000 | 2.85383200  | -1.08464300 | C | 0.00000000 | 0.00000000  | 2.70782700  |
| C | 0.00000000 | 2.44014700  | -2.42195500 | H | 0.00000000 | 0.00000000  | 3.79217700  |
| C | 0.00000000 | -2.44014700 | -2.42195500 | C | 0.00000000 | -1.14991500 | 1.90181000  |
| C | 0.00000000 | 2.44014700  | 2.42195500  | H | 0.00000000 | -2.17598300 | 2.24794000  |
| C | 0.00000000 | -1.12956000 | 2.89636700  |   |            |             |             |
| C | 0.00000000 | -2.44014700 | 2.42195500  |   |            |             |             |
| H | 0.00000000 | -3.21860100 | -3.17869700 |   |            |             |             |
| H | 0.00000000 | -3.21860100 | 3.17869700  |   |            |             |             |
| H | 0.00000000 | 3.21860100  | 3.17869700  |   |            |             |             |
| N | 0.00000000 | 0.00000000  | 2.11733800  |   |            |             |             |
| N | 0.00000000 | 2.02764600  | 0.00000000  |   |            |             |             |
| N | 0.00000000 | 0.00000000  | -2.11733800 |   |            |             |             |
| N | 0.00000000 | -2.02764600 | 0.00000000  |   |            |             |             |
| H | 0.00000000 | 1.34668800  | 5.11682100  |   |            |             |             |
| H | 0.00000000 | -1.34668800 | 5.11682100  |   |            |             |             |
| H | 0.00000000 | -5.10422500 | 1.35102800  |   |            |             |             |
| H | 0.00000000 | -5.10422500 | -1.35102800 |   |            |             |             |
| H | 0.00000000 | -1.34668800 | -5.11682100 |   |            |             |             |
| H | 0.00000000 | 1.34668800  | -5.11682100 |   |            |             |             |
| H | 0.00000000 | 5.10422500  | -1.35102800 |   |            |             |             |
| H | 0.00000000 | 5.10422500  | 1.35102800  |   |            |             |             |
| H | 0.00000000 | 3.21860100  | -3.17869700 |   |            |             |             |
| H | 0.00000000 | 0.00000000  | 1.10284300  |   |            |             |             |
| H | 0.00000000 | 0.00000000  | -1.10284300 |   |            |             |             |

|    | 1(Zn) <sup>II</sup> |             |             | D23 |             |             |             |
|----|---------------------|-------------|-------------|-----|-------------|-------------|-------------|
| C  | -3.41237800         | 2.52044600  | 0.03074600  | C   | -5.74481800 | -1.78890000 | -0.27639500 |
| C  | -2.45173300         | 3.48666300  | 0.03499100  | C   | -4.77780600 | -2.80932300 | -0.09758000 |
| C  | -2.73095000         | 1.25535200  | -0.00655900 | C   | -4.90414100 | -4.13696800 | 0.39012100  |
| C  | -2.45175000         | -3.48664500 | 0.03489200  | C   | -3.63272900 | -4.68680400 | 0.50919100  |
| C  | -3.41238500         | -2.52042000 | 0.03063800  | C   | -2.68436900 | -3.71559700 | 0.10528200  |
| C  | -2.73095100         | -1.25533000 | -0.00654900 | N   | -3.41955600 | -2.60726100 | -0.27706700 |
| C  | 3.55309200          | -2.52386200 | -0.03864100 | C   | -1.26360900 | -3.66834700 | 0.20728600  |
| C  | 2.59422400          | -3.48909300 | -0.04724100 | C   | -0.68600900 | -2.39942300 | 0.14684700  |
| C  | 2.86907600          | -1.25639900 | -0.00118600 | C   | 0.60582200  | -1.87937200 | 0.10303000  |
| C  | 1.31604800          | -2.81632800 | -0.00470500 | N   | 1.86901400  | -2.55647800 | 0.03788300  |
| C  | 3.55309700          | 2.52387600  | -0.03846600 | C   | 2.54806700  | -3.74295800 | -0.26388000 |
| C  | 2.59422500          | 3.48910400  | -0.04707300 | H   | 2.02669000  | -4.67764500 | -0.38741300 |
| C  | 2.86907700          | 1.25641000  | -0.00115900 | C   | 3.90962000  | -3.48329000 | -0.34734100 |
| C  | 1.31605000          | 2.81633500  | -0.00467800 | H   | 4.65679900  | -4.23390000 | -0.56130100 |
| C  | -1.17691800         | 2.81265500  | -0.00911200 | C   | 4.11788700  | -2.06882700 | -0.11319700 |
| C  | 0.07251300          | 3.46522300  | -0.00832300 | C   | 2.83094100  | -1.61040000 | 0.11213200  |
| C  | 3.52221000          | 0.00000500  | 0.00043700  | C   | 2.31202100  | -0.34291000 | 0.16466800  |
| C  | -3.38687600         | 0.00001000  | -0.00542200 | C   | 0.89872400  | -0.45587900 | 0.16540300  |
| C  | -1.17692400         | -2.81264300 | -0.00908500 | C   | 0.03353200  | 0.69530500  | 0.16174200  |
| C  | 0.07250700          | -3.46521900 | -0.00830900 | N   | -1.28791200 | 0.66365900  | 0.05190700  |
| N  | -1.37267800         | -1.44825700 | -0.02853900 | C   | -1.73626700 | 1.99967900  | 0.01777600  |
| N  | -1.37268200         | 1.44827000  | -0.02864600 | C   | -3.08383500 | 2.39284500  | -0.19520700 |
| N  | 1.51405600          | 1.44824100  | 0.01724200  | C   | -4.17570100 | 1.51563500  | -0.33767900 |
| N  | 1.51405400          | -1.44823600 | 0.01730900  | N   | -4.15403300 | 0.14640000  | -0.13661400 |
| H  | -4.48486800         | -2.64152800 | 0.05955600  | C   | -5.40158500 | -0.42283700 | -0.37899100 |
| H  | -2.59026800         | -4.55639300 | 0.07342700  | C   | -6.23961800 | 0.66289600  | -0.78624200 |
| H  | 2.73354100          | -4.55872600 | -0.08751100 | H   | -7.26529000 | 0.54923700  | -1.10311800 |
| H  | 4.62549800          | -2.64601900 | -0.06546600 | C   | -5.50741800 | 1.82568800  | -0.75804800 |
| H  | 2.73353900          | 4.55874100  | -0.08726900 | H   | -5.84286900 | 2.81201700  | -1.03989800 |
| H  | -2.59022900         | 4.55641200  | 0.07360700  | C   | -0.64166000 | 2.87261700  | 0.16729600  |
| H  | -4.48485700         | 2.64155500  | 0.05977200  | C   | 0.52816300  | 2.10108400  | 0.24395100  |
| Zn | 0.07080400          | 0.00000400  | -0.00632000 | C   | 1.84017500  | 2.65527200  | 0.32582000  |
| H  | 4.62550600          | 2.64603000  | -0.06516500 | C   | 3.08205600  | 2.01470700  | 0.25945800  |
| C  | 0.07049200          | -4.96392900 | -0.01040600 | N   | 3.25897000  | 0.63291900  | 0.12801500  |
| C  | -0.37184400         | -5.67836400 | -1.13450900 | C   | 4.63766400  | 0.29913800  | 0.02224300  |
| C  | 0.51113500          | -5.68292500 | 1.11134100  | C   | 5.10084500  | -1.03422200 | -0.14603000 |
| C  | -0.37161100         | -7.07340900 | -1.13733300 | C   | 6.53037200  | -1.33347100 | -0.34959100 |
| C  | 0.50941400          | -7.07810600 | 1.10916800  | C   | 7.10142900  | -2.46084000 | 0.27650900  |
| C  | 0.06860400          | -7.77756400 | -0.01534600 | C   | 8.43782200  | -2.78836100 | 0.09049900  |
| C  | 0.07048700          | 4.96394000  | -0.01038600 | C   | 9.21949400  | -1.98217400 | -0.73624900 |
| C  | -0.37153600         | 5.67837600  | -1.13460900 | C   | 8.68888300  | -0.86595800 | -1.38162500 |
| C  | 0.51079300          | 5.68292700  | 1.11149500  | C   | 7.34994500  | -0.55044000 | -1.18772600 |
| C  | 0.50905100          | 7.07811000  | 1.10933600  | C   | 5.32396800  | 1.54783900  | 0.14763500  |
| C  | -0.37132600         | 7.07342300  | -1.13741800 | C   | 4.40580300  | 2.55986800  | 0.29037600  |
| C  | 0.06855500          | 7.77757300  | -0.01529700 | C   | 1.92017000  | 4.14819500  | 0.46341400  |
| H  | -0.70900300         | 5.13257500  | -2.01054000 | C   | 1.55481800  | 4.76872700  | 1.66911100  |
| H  | -0.71131000         | 7.60961400  | -2.01872700 | C   | 2.35932600  | 4.94457600  | -0.60607900 |
| H  | 0.06812200          | 8.86359300  | -0.01736600 | C   | 1.63376800  | 6.15021100  | 1.81243400  |
| H  | 0.84877700          | 7.61781300  | 1.98859000  | C   | 2.07512200  | 6.91097600  | 0.73139700  |
| H  | 0.84849500          | 5.14056700  | 1.98946500  | C   | 2.43757400  | 6.32878200  | -0.48063700 |
| H  | -0.71184000         | -7.60959900 | -2.01854900 | H   | -5.83755700 | -4.59388300 | 0.68386000  |
| H  | -0.70956600         | -5.13255700 | -2.01033700 | H   | -3.38174000 | -5.65545000 | 0.91641500  |
| H  | 0.06819500          | -8.86358400 | -0.01742600 | H   | 4.62672600  | 3.60962500  | 0.40907700  |
| H  | 0.84939700          | -7.61781700 | 1.98831700  | H   | 6.39775000  | 1.65580400  | 0.15094400  |
| H  | 0.84908000          | -5.14056400 | 1.98921700  | H   | -0.69824700 | 3.94858700  | 0.18637800  |
| C  | -4.80593200         | 0.00001300  | 0.00765800  | H   | -3.04343200 | -1.86976600 | -0.85225000 |
| C  | 4.94152600          | 0.00000700  | -0.00589500 | H   | -3.34900600 | -0.29401600 | 0.28607000  |
| C  | -6.02605100         | 0.00002100  | 0.01718300  | H   | -1.38043400 | -1.56955500 | 0.15788300  |
| C  | 6.16131600          | 0.00002200  | -0.00765600 | N   | 10.63223100 | -2.32014900 | -0.93631600 |
| C  | -7.44402300         | 0.00004500  | 0.03048400  | N   | 2.16177300  | 8.37250600  | 0.87380700  |
| C  | -8.17796500         | -1.20444100 | 0.03629200  | H   | 6.48836800  | -3.06820500 | 0.93356900  |
| C  | -8.17801300         | 1.20449300  | 0.03513900  | H   | 8.88749100  | -3.64461700 | 0.57708700  |
| C  | -9.56286000         | -1.20996500 | 0.05053300  | H   | 9.32363400  | -0.27629600 | -2.03096200 |

|   |              |             |             |   |              |             |             |
|---|--------------|-------------|-------------|---|--------------|-------------|-------------|
| H | -7.64340800  | -2.14907300 | 0.02669600  | H | 6.92195400   | 0.29365100  | -1.71653000 |
| C | -9.56291300  | 1.20996200  | 0.04936900  | H | 1.20747100   | 4.15970300  | 2.49684400  |
| H | -7.64351400  | 2.14914900  | 0.02458100  | H | 1.36253100   | 6.64424300  | 2.73672600  |
| C | -10.30005900 | -0.00000900 | 0.06573600  | H | 2.63419400   | 4.47293200  | -1.54376800 |
| H | -10.07685300 | -2.16283700 | 0.04930400  | H | 2.76868200   | 6.95836600  | -1.29673200 |
| H | -10.07694900 | 2.16280900  | 0.04716300  | O | 11.30078800  | -1.58361800 | -1.66361500 |
| C | 7.57874900   | 0.00001800  | -0.00803300 | O | 11.06858500  | -3.32106500 | -0.36504500 |
| C | 8.29936200   | -1.21657600 | -0.00812100 | O | 2.54426500   | 9.02029900  | -0.10099500 |
| C | 8.29938700   | 1.21659500  | -0.00765200 | O | 1.84885100   | 8.86124700  | 1.95913200  |
| C | 9.68596200   | -1.21928400 | -0.00765100 | C | -7.17451000  | -2.18133600 | -0.32284100 |
| H | 7.75540800   | -2.15461300 | -0.00829600 | C | -7.61295100  | -3.23833500 | -1.14199600 |
| C | 9.68598600   | 1.21927200  | -0.00718100 | C | -8.14778400  | -1.53232800 | 0.45947800  |
| H | 7.75545300   | 2.15464400  | -0.00746700 | C | -8.94706300  | -3.62443900 | -1.18493200 |
| C | 10.36524200  | -0.00001300 | -0.00713400 | H | -6.89133000  | -3.75614500 | -1.76607300 |
| H | 10.25253300  | -2.14178700 | -0.00762200 | C | -9.48491600  | -1.90880900 | 0.42169800  |
| H | 10.25257900  | 2.14176200  | -0.00677000 | H | -7.84261100  | -0.73053200 | 1.12440100  |
| N | -11.68042200 | -0.00002900 | 0.09981500  | C | -9.91122200  | -2.96376700 | -0.40378700 |
| N | 11.82985900  | -0.00002700 | -0.00633400 | H | -9.25379800  | -4.43580500 | -1.84061900 |
| C | -12.40955900 | -1.25365100 | 0.00692900  | H | -10.20960500 | -1.38941200 | 1.04415100  |
| H | -13.47877600 | -1.05183600 | 0.07681200  | C | -0.53295000  | -4.92691000 | 0.49472900  |
| H | -12.22292700 | -1.77943900 | -0.94082400 | C | 0.25949000   | -5.05154700 | 1.64932800  |
| H | -12.14498300 | -1.93165100 | 0.82750700  | C | -0.63822000  | -6.05118400 | -0.34165600 |
| C | -12.40963200 | 1.25347800  | 0.00611200  | C | 0.92688200   | -6.23349400 | 1.94954800  |
| H | -13.47880800 | 1.05171400  | 0.07679800  | H | 0.34233600   | -4.20621900 | 2.32579600  |
| H | -12.14461500 | 1.93223700  | 0.82591600  | C | 0.03098300   | -7.23711000 | -0.05413200 |
| H | -12.22354000 | 1.77839800  | -0.94223400 | H | -1.24866700  | -5.98836200 | -1.23765600 |
| O | 12.40416700  | -1.09077500 | -0.00625700 | C | 0.82691900   | -7.34986500 | 1.09958500  |
| O | 12.40418800  | 1.09071000  | -0.00568600 | H | 1.53051000   | -6.29983300 | 2.85139300  |
|   |              |             |             | H | -0.05817600  | -8.08575200 | -0.72797600 |
|   |              |             |             | C | -3.38202600  | 3.85195200  | -0.31431200 |
|   |              |             |             | C | -2.82104100  | 4.63818900  | -1.33488300 |
|   |              |             |             | C | -4.24844700  | 4.49239700  | 0.58700100  |
|   |              |             |             | C | -3.10431800  | 5.99488500  | -1.44985000 |
|   |              |             |             | H | -2.15954000  | 4.17117700  | -2.05828200 |
|   |              |             |             | C | -4.53883600  | 5.84885300  | 0.48275600  |
|   |              |             |             | H | -4.69631000  | 3.91424000  | 1.38982800  |
|   |              |             |             | C | -3.96874400  | 6.62698000  | -0.53906500 |
|   |              |             |             | H | -2.65684100  | 6.57466500  | -2.25362600 |
|   |              |             |             | H | -5.20370200  | 6.31692500  | 1.20473100  |
|   |              |             |             | N | -11.25902200 | -3.30820400 | -0.48766300 |
|   |              |             |             | H | -11.44718200 | -4.25169900 | -0.79691900 |
|   |              |             |             | H | -11.82288400 | -3.05062200 | 0.31041600  |
|   |              |             |             | N | 1.54305100   | -8.51582500 | 1.36408300  |
|   |              |             |             | H | 1.79871600   | -8.65702600 | 2.33157900  |
|   |              |             |             | H | 1.17375300   | -9.35692400 | 0.94279500  |
|   |              |             |             | N | -4.20784500  | 7.99836200  | -0.61305600 |
|   |              |             |             | H | -4.06306300  | 8.41581900  | -1.52178500 |
|   |              |             |             | H | -5.06608000  | 8.31307000  | -0.18245700 |

## Reference

- 1 S. R. Graham, G. M. Ferrence and T. D. Lash, *Chem. Commun.*, 2002, 894.
- 2 E. Annoni , M. Pizzotti , R. Ugo , S. Quici , T. Morotti , M. Bruschi and P. Mussini, *Eur. J. Inorg. Chem.*, 2005, 3857.
- 3 S. M. LeCours, H.-W. Guan, S. G. DiMugno, C. H. Wang and M. J. Therien, *J. Am. Chem. Soc.*, 1996, **118**, 1497.
- 4 B. Li, P. Sathishkumar, F. L. Gu and C. Zhu, *J. Phys. Chem. A*, 2020, **124**, 955.
